# Supplementary material for: A Glance at Recombination Hotspots in the Domestic Cat
Source: PLoS One. 2016 Feb 9;11(2):e0148710. doi: 10.1371/journal.pone.0148710 (PMC4747544; doi:10.1371/journal.pone.0148710)
Supplement: S1 Table — (XLSX) [file pone.0148710.s003.xlsx]

## Sheet: ERB_snps_in
No	snp_id	Position 6.2 assembly	chr	freq_mi	hetero	sam_typ	tot_sam	per_typ	1	2	3	4	5	6	7	8	9	10	11	12	13	14	15	16	17	18	19	20	21	22
1	chrA1.224646160	187299691	chrA1	0.25	0.384615	20	22	0.909091	AA	AA	AG	GG	GG	GG	GG	GG	GG	NA	GG	GG	AG	AG	AA	AG	GG	GG	GG	GG	GG	NA
2	chrA1.224653353	187302429	chrA1	0.318182	0.443975	22	22	1	GG	GG	GG	AG	GG	GG	AG	GG	AA	GG	AA	GG	AG	GG	GG	GG	AG	AG	AG	AG	AA	AG
3	chrA1.224655378	187304641	chrA1	0.35	0.466667	20	22	0.909091	GG	GG	AG	AA	GG	AA	AA	AG	AA	GG	AA	AA	AG	AG	GG	AA	AA	AA	AA	AA	NA	NA
4	chrA1.224656005	187305268	chrA1	0.340909	0.459831	22	22	1	GG	GG	CG	CC	GG	CC	CC	CG	CC	GG	CC	CC	CG	CG	GG	CG	CC	CC	CC	CC	CC	CC
5	chrA1.224668227	187314720	chrA1	0.475	0.511538	20	22	0.909091	AG	AA	AA	AG	GG	AA	AG	AG	GG	GG	AG	AA	AG	AA	AG	NA	AG	AG	AG	AG	NA	GG
6	chrA1.224669215	187315707	chrA1	0.166667	0.284553	21	22	0.954545	AC	CC	AC	AA	AA	AA	AA	AA	AA	AA	AA	AA	AC	AC	AC	AA	AA	AA	AA	AA	AA	NA
7	chrA1.224672326	187318812	chrA1	0.227273	0.359408	22	22	1	AG	AG	AG	GG	AA	GG	GG	AG	GG	AG	GG	GG	AG	AG	AG	GG	GG	GG	GG	GG	GG	GG
8	chrA1.224678918	187324921	chrA1	0.142857	0.250871	21	22	0.954545	AT	AT	AT	TT	TT	TT	TT	TT	TT	TT	TT	TT	AT	AT	AT	TT	TT	TT	TT	TT	TT	NA
9	chrA1.224684227	187330223	chrA1	0.131579	0.234708	19	22	0.863636	AA	AC	AA	AA	AA	AA	AC	AA	CC	AA	NA	AA	AA	AA	AA	AA	AA	NA	AA	AA	NA	AC
10	chrA1.224685487	187331482	chrA1	0.225	0.357692	20	22	0.909091	AG	AG	GG	GG	GG	GG	AG	GG	AA	AG	GG	GG	GG	GG	AG	NA	GG	AG	NA	GG	GG	AG
11	chrA1.224690050	187336029	chrA1	0.5	0.512821	20	22	0.909091	AG	GG	AG	AG	GG	AA	AA	AG	AA	GG	AG	AA	GG	AG	GG	AG	AG	AA	AG	AG	NA	NA
12	chrA1.224691881	187337862	chrA1	0.475	0.511538	20	22	0.909091	GG	GG	AG	AG	GG	AA	AA	AG	AA	NA	AG	AA	GG	AG	GG	AG	AG	AA	AG	AG	NA	AA
13	chrA1.224714463	187359485	chrA1	0.289474	0.422475	19	22	0.863636	AG	AG	AG	NA	AA	GG	GG	GG	GG	AG	NA	GG	NA	AG	AG	GG	AG	GG	AG	AG	GG	GG
14	chrA1.224726981	187363147	chrA1	0.357143	0.470383	21	22	0.954545	AG	AG	AG	AG	GG	AA	AA	AA	AA	AG	AG	AA	GG	AG	AG	AA	AG	AA	AG	NA	AG	AA
15	chrA1.224738683	187375300	chrA1	0.416667	0.5	18	22	0.818182	AG	GG	NA	AG	GG	AA	AG	AG	GG	GG	AG	AA	GG	AA	AG	NA	AG	GG	AG	AG	NA	NA
16	chrA1.224739417	187376034	chrA1	0.45	0.507692	20	22	0.909091	AG	GG	AA	NA	GG	AA	AG	AG	GG	NA	AA	AA	GG	AA	AG	AG	AG	GG	AG	AG	GG	GG
17	chrA1.224740388	187376940	chrA1	0.105263	0.193457	19	22	0.863636	CC	CC	CC	CC	CC	CC	CC	CC	AA	NA	NA	CC	AC	CC	CC	CC	CC	AC	CC	CC	CC	NA
18	chrA1.224755957	187392090	chrA1	0.35	0.466667	20	22	0.909091	GG	AG	NA	NA	AA	GG	GG	GG	GG	AG	AA	GG	AG	AG	AG	GG	AG	AG	AG	AG	AG	GG
19	chrA1.224787777	187415891	chrA1	0.452381	0.507549	21	22	0.954545	CC	CC	CG	CG	CC	GG	GG	GG	GG	CG	CG	GG	CC	CG	CC	GG	CG	CG	CG	CG	NA	GG
20	chrA1.224884928	187482362	chrA1	0.113636	0.206131	22	22	1	AG	AA	GG	GG	GG	GG	GG	GG	GG	GG	GG	GG	AG	GG	GG	GG	GG	AG	GG	GG	GG	GG
21	chrA1.224914572	187508215	chrA1	0.25	0.384615	20	22	0.909091	AG	AA	AG	NA	AA	AA	AA	AA	AA	AA	AG	AA	AA	NA	GG	AG	AG	AA	AG	AG	AG	AA
22	chrA1.224920374	187513979	chrA1	0.113636	0.206131	22	22	1	GG	GG	GG	GG	GG	GG	GG	AG	AA	GG	GG	GG	GG	GG	GG	GG	GG	GG	GG	GG	GG	AA
23	chrA1.224927573	187521149	chrA1	0.166667	0.284553	21	22	0.954545	GG	GG	GG	GG	AA	GG	GG	AG	AA	AG	GG	GG	GG	GG	GG	GG	GG	GG	GG	GG	NA	AG
24	chrA1.224940728	187530525	chrA1	0.113636	0.206131	22	22	1	AG	GG	AA	AA	AA	AA	AA	AA	AA	AA	AA	AA	AG	AA	AA	AA	AA	AG	AA	AA	AA	AA
25	chrA1.224959563	187542755	chrA1	0.105263	0.193457	19	22	0.863636	AA	AA	AA	AA	AA	AA	AA	AC	CC	NA	AA	AA	AA	AA	AA	NA	AA	AA	AA	AA	NA	AC
26	chrA1.224983798	187569064	chrA1	0.119048	0.214866	21	22	0.954545	AG	GG	AA	AA	AA	AA	AA	AA	AA	AA	AA	AA	AG	AA	AA	AA	AA	AG	AA	AA	NA	AA
27	chrA1.224999570	187580619	chrA1	0.2	0.328205	20	22	0.909091	GG	GG	AG	AG	GG	GG	GG	GG	GG	GG	NA	GG	AG	AG	AG	GG	AG	NA	AG	AG	GG	GG
28	chrA1.225005620	187585413	chrA1	0.175	0.296154	20	22	0.909091	GG	GG	AG	AG	GG	GG	GG	GG	GG	GG	NA	GG	GG	AG	AG	GG	AG	GG	AG	AG	NA	GG
29	chrA1.225048503	187613712	chrA1	0.305556	0.436508	18	22	0.818182	GG	GG	AG	AG	GG	AG	AG	AG	GG	NA	NA	AG	GG	AG	GG	GG	NA	AG	NA	AG	AG	AG
30	chrA1.225042944	187613857	chrA1	0.227273	0.359408	22	22	1	AA	AA	AA	AA	AG	AA	AG	AA	AA	AG	AG	AA	AA	AA	AA	AG	AG	AG	AG	AG	AA	AG
31	chrA1.225053060	187618267	chrA1	0.111111	0.203175	18	22	0.818182	GG	GG	GG	GG	GG	NA	GG	AA	AA	GG	NA	NA	GG	GG	GG	GG	GG	GG	GG	GG	GG	NA
32	chrA1.225112826	187666921	chrA1	0.25	0.384615	20	22	0.909091	AG	GG	AA	AA	AA	AA	NA	AG	GG	AA	AA	AA	GG	AA	AA	NA	AA	AG	AA	AA	AA	AG
33	chrA1.225120515	187673865	chrA1	0.113636	0.206131	22	22	1	GG	GG	GG	GG	GG	GG	GG	CG	CC	GG	GG	GG	GG	GG	GG	GG	GG	GG	GG	GG	CG	CG
34	chrA1.225133425	187686786	chrA1	0.238095	0.371661	21	22	0.954545	GG	GG	AG	AG	GG	GG	AG	GG	GG	GG	NA	GG	AG	AG	AG	GG	AG	GG	AG	AG	AG	GG
35	chrA1.225248483	187780877	chrA1	0.136364	0.241015	22	22	1	AG	GG	AA	AA	AA	AA	AA	AA	AA	AA	AA	AA	AG	AA	AA	AG	AA	AG	AA	AA	AA	AA
36	chrA1.225304363	187827722	chrA1	0.210526	0.341394	19	22	0.863636	GG	AG	AA	AA	AA	AA	AA	NA	GG	NA	AA	AA	AG	AA	AG	AA	AA	NA	AA	AA	AA	AG
37	chrA1.225330896	187848269	chrA1	0.473684	0.512091	19	22	0.863636	AC	AC	AC	AC	AA	CC	AC	AC	AA	NA	CC	CC	NA	AC	AA	AC	AC	AC	AC	AC	CC	NA
38	chrA1.225347730	187859642	chrA1	0.368421	0.477952	19	22	0.863636	AA	AG	AG	AG	AA	GG	GG	GG	GG	AG	NA	GG	GG	AG	AA	NA	AG	GG	AG	AG	NA	GG
39	chrA1.225356428	187870601	chrA1	0.289474	0.422475	19	22	0.863636	AA	AG	GG	AG	GG	GG	GG	GG	GG	GG	NA	GG	NA	AG	AA	AG	AG	GG	AG	AG	NA	GG
40	chrA1.225361399	187875564	chrA1	0.214286	0.344948	21	22	0.954545	AA	AA	NA	AG	AA	AA	AA	AA	AA	AA	GG	AA	AG	AG	AG	AA	AG	AA	AG	AG	AA	AA
41	chrA1.225404804	187907485	chrA1	0.204545	0.332981	22	22	1	AT	AT	AA	AA	AA	AA	AA	AT	TT	AA	AA	AA	AA	AA	AT	AT	AA	AT	AA	AA	AA	AT
42	chrA1.225439151	187932983	chrA1	0.431818	0.502114	22	22	1	GG	GG	AG	AA	GG	AA	AG	GG	GG	GG	AA	AA	GG	AG	GG	AG	AG	AA	AG	AG	GG	AA
43	chrA1.225449236	187943076	chrA1	0.190476	0.315912	21	22	0.954545	AT	AA	AA	AA	TT	AA	AA	AA	AA	AT	AA	AA	AA	AA	AA	NA	AT	AT	AT	AT	AA	AA
44	chrA1.225464949	187953361	chrA1	0.166667	0.284553	21	22	0.954545	AA	AC	CC	CC	CC	CC	CC	CC	CC	CC	CC	CC	CC	CC	CC	CC	AC	AC	AC	AC	NA	CC
45	chrA1.225470811	187958706	chrA1	0.119048	0.214866	21	22	0.954545	AG	AG	AA	AA	GG	AA	AA	AA	AA	AG	AA	AA	AA	AA	AA	AA	AA	AA	AA	AA	NA	AA
46	chrA1.225481099	187967645	chrA1	0.214286	0.344948	21	22	0.954545	AG	AG	NA	GG	AA	GG	GG	AG	AA	AG	GG	GG	GG	GG	AG	GG	GG	GG	GG	GG	GG	GG
47	chrA1.225486702	187973248	chrA1	0.333333	0.455285	21	22	0.954545	AC	CC	AC	AA	CC	AA	AA	AC	CC	AC	AA	AA	AA	AA	AC	AC	AC	NA	AC	AA	AA	AA
48	chrA1.225515145	187993549	chrA1	0.45	0.507692	20	22	0.909091	AG	GG	AG	AA	AA	AA	AG	GG	GG	AG	AA	AA	AG	AG	GG	GG	AG	NA	AG	AA	NA	AA
49	chrA1.225583838	188045266	chrA1	0.357143	0.470383	21	22	0.954545	AG	AA	AG	GG	AA	GG	GG	AG	AA	AG	GG	GG	GG	GG	AG	AA	AG	NA	AG	GG	GG	GG
50	chrA1.225592485	188054958	chrA1	0.363636	0.473573	22	22	1	AG	AA	AG	GG	AA	GG	GG	AG	AA	AG	GG	GG	GG	GG	AG	AA	AG	AG	AG	GG	GG	GG
51	chrA1.225608504	188065717	chrA1	0.166667	0.284553	21	22	0.954545	AG	AA	AA	AA	AA	AA	AG	AG	AA	AG	AA	AA	NA	AA	AG	AG	AA	AA	AA	AA	AG	AA
52	chrA1.225621078	188075888	chrA1	0.125	0.224359	20	22	0.909091	GG	GG	GG	GG	GG	GG	AG	AG	GG	NA	GG	GG	AG	GG	AG	AG	GG	GG	GG	GG	NA	GG
53	chrA1.225627941	188082901	chrA1	0.2	0.328205	20	22	0.909091	AA	AA	AA	AA	AA	AA	AG	AG	AA	NA	AA	AA	AG	AG	AG	NA	AA	AG	AA	AA	GG	AA
1	chrA2.156330509	98172535	chrA2	0.5	0.512195	21	22	0.954545	CC	CC	CG	CC	GG	CG	GG	CG	CC	CG	GG	CC	CG	CG	CG	NA	GG	CG	GG	CG	CG	CG
2	chrA2.156334134	98176160	chrA2	0.142857	0.250871	21	22	0.954545	AA	AA	AA	AA	GG	AA	AG	AA	AA	AG	AA	AA	AA	AG	AA	AA	AA	AG	AA	AA	AA	NA
3	chrA2.156338139	98180164	chrA2	0.236842	0.371266	19	22	0.863636	GG	GG	GG	GG	CC	GG	NA	GG	GG	CG	NA	GG	GG	CG	GG	CC	CG	CG	GG	CG	GG	NA
4	chrA2.156340199	98182222	chrA2	0.181818	0.30444	22	22	1	AA	AA	AA	AA	TT	AA	AT	AA	AA	AT	AA	AA	AA	AT	AA	AT	AA	AT	AA	AA	AA	AT
5	chrA2.156342045	98184065	chrA2	0.404762	0.493612	21	22	0.954545	AA	AA	AC	NA	CC	AC	AC	AC	AA	AC	CC	AA	AC	CC	AC	CC	CC	AC	CC	AC	CC	CC
6	chrA2.156342989	98185009	chrA2	0.386364	0.485201	22	22	1	CC	CC	AC	CC	AA	AC	AC	AC	CC	AC	CC	CC	CC	AC	AC	AA	AA	AC	AC	AC	CC	AC
7	chrA2.156346001	98188021	chrA2	0.35	0.466667	20	22	0.909091	AA	AA	AA	AA	GG	AA	AG	AA	AA	AG	GG	AA	AG	AG	AA	GG	AG	NA	AG	AG	NA	AG
8	chrA2.156348415	98190435	chrA2	0.238095	0.371661	21	22	0.954545	GG	GG	GG	GG	AA	GG	AG	GG	GG	AG	AA	GG	GG	AG	GG	AA	GG	NA	GG	GG	GG	AG
9	chrA2.156353363	98195382	chrA2	0.380952	0.483159	21	22	0.954545	AA	AA	AA	AA	TT	AA	AT	AA	AA	AT	TT	AA	NA	AT	AA	TT	AT	AT	AT	AT	TT	AT
10	chrA2.156354548	98196567	chrA2	0.227273	0.359408	22	22	1	CC	CC	CC	CC	CC	CC	CC	CC	CC	CC	AA	CC	AC	CC	CC	AA	AC	CC	AC	AC	AA	CC
11	chrA2.156355442	98197461	chrA2	0.204545	0.332981	22	22	1	GG	GG	GG	GG	AA	GG	AG	GG	GG	AG	GG	GG	GG	AG	GG	AG	GG	GG	GG	GG	AG	AA
12	chrA2.156358028	98200046	chrA2	0.380952	0.483159	21	22	0.954545	AA	AA	AA	AA	GG	AA	AG	AA	AA	AG	GG	AA	GG	AG	AA	GG	AG	AG	AG	AG	NA	AG
13	chrA2.156359572	98201590	chrA2	0.333333	0.457143	18	22	0.818182	AA	AA	AA	AA	GG	AA	AG	AA	AA	AA	GG	NA	NA	AG	AA	NA	AG	AG	AG	AG	GG	NA
14	chrA2.156361520	98203538	chrA2	0.295455	0.426004	22	22	1	AA	AA	AA	AA	GG	AA	AA	AA	AA	AG	GG	AA	AG	AA	AA	GG	AG	AG	AG	AG	AG	AA
15	chrA2.156362531	98204549	chrA2	0.190476	0.315912	21	22	0.954545	AA	AA	AA	AA	GG	AA	AA	AA	AA	NA	GG	AA	AA	AA	AA	GG	AG	AA	AA	AG	AA	AA
16	chrA2.156363573	98205591	chrA2	0.25	0.384615	20	22	0.909091	AA	AA	AA	AA	GG	AA	AA	AA	AA	NA	GG	AA	NA	AA	AA	GG	AG	AA	AG	AG	AG	AA
17	chrA2.156386120	98213628	chrA2	0.272727	0.40592	22	22	1	AA	AA	AA	AA	GG	AA	AA	AA	AA	AG	GG	AA	GG	AA	AA	GG	AA	GG	AG	AA	AA	AA
18	chrA2.156398522	98222108	chrA2	0.113636	0.206131	22	22	1	AA	AA	AC	AA	AA	AC	AA	AA	AA	AA	AC	AA	AC	AA	AA	AA	AA	AA	AC	AA	AA	AA
19	chrA2.156400145	98223732	chrA2	0.166667	0.284553	21	22	0.954545	AA	AA	AC	AA	AA	AC	AA	AA	AA	AA	NA	AA	CC	AA	AA	AA	AA	AA	AC	AA	CC	AA
20	chrA2.156402557	98226144	chrA2	0.289474	0.422475	19	22	0.863636	CC	CC	AC	CC	AA	AC	CC	CC	CC	NA	AA	CC	AC	CC	CC	NA	AC	AC	AC	AC	NA	CC
21	chrA2.156412658	98236230	chrA2	0.477273	0.510571	22	22	1	AA	AA	AA	AA	CC	CC	AA	AA	AC	CC	CC	AA	AC	AA	AC	CC	AC	CC	AC	CC	CC	AA
22	chrA2.156415939	98239510	chrA2	0.166667	0.284553	21	22	0.954545	AA	AA	AA	AA	AA	AA	AG	AA	AA	AA	GG	AA	AA	AG	AA	GG	AA	AA	AA	AA	NA	AG
23	chrA2.156416884	98240455	chrA2	0.190476	0.315912	21	22	0.954545	AA	AA	AA	AA	AA	AG	AA	AG	AA	AA	GG	AA	NA	AA	AG	AG	AG	AA	AG	AA	AA	AA
24	chrA2.156417775	98241346	chrA2	0.47619	0.511034	21	22	0.954545	AA	AA	AA	AG	GG	AG	AG	AG	AA	AG	GG	AA	GG	AG	AG	GG	AG	NA	GG	AA	AG	AG
25	chrA2.156421187	98244753	chrA2	0.275	0.408974	20	22	0.909091	AA	AA	AA	AG	GG	AA	AG	AA	AA	AG	AA	AA	GG	AG	AA	NA	AA	AG	AG	AA	AG	NA
26	chrA2.156422928	98246493	chrA2	0.131579	0.234708	19	22	0.863636	GG	GG	GG	NA	AA	GG	GG	GG	GG	AG	GG	GG	NA	GG	GG	GG	GG	AG	AG	GG	NA	GG
27	chrA2.156448066	98255010	chrA2	0.333333	0.455285	21	22	0.954545	CC	CC	CC	CC	CC	CG	CG	CG	CC	NA	CG	CC	CC	CG	CG	GG	GG	CG	GG	CC	CC	CG
28	chrA2.156479726	98285313	chrA2	0.159091	0.273784	22	22	1	AA	AA	AA	AA	AA	AG	AA	AG	AA	AA	AG	AA	AA	AA	AG	AG	AA	AA	GG	AA	AA	AA
29	chrA2.156513666	98310947	chrA2	0.113636	0.206131	22	22	1	CC	CC	CC	CC	CC	CG	CC	CG	CC	CC	CG	CC	CC	CC	CG	CC	CC	CC	CG	CC	CC	CC
30	chrA2.156575070	98359436	chrA2	0.3	0.430769	20	22	0.909091	NA	AA	AA	AC	CC	AA	NA	AA	AA	AC	AA	AA	CC	AC	AA	AC	AA	AC	AA	AA	CC	AC
31	chrA2.156590175	98374435	chrA2	0.447368	0.507824	19	22	0.863636	AA	AA	AA	AG	GG	AG	NA	AG	AA	AG	GG	AA	NA	AG	AG	GG	AG	NA	GG	AA	AG	AG
32	chrA2.156611706	98387031	chrA2	0.472222	0.512698	18	22	0.818182	AA	AA	AA	AG	GG	AG	AG	AG	AG	NA	GG	AA	GG	AG	AG	GG	AA	NA	GG	AA	NA	NA
33	chrA2.156624179	98396565	chrA2	0.472222	0.512698	18	22	0.818182	AA	AA	AA	NA	GG	GG	AG	AG	AG	NA	GG	AA	GG	NA	AG	GG	AG	NA	GG	AA	AG	AG
34	chrA2.156656214	98423777	chrA2	0.166667	0.284553	21	22	0.954545	GG	GG	AG	GG	GG	AG	AG	GG	AG	GG	GG	GG	GG	AG	GG	NA	AG	GG	GG	GG	GG	AG
35	chrA2.156682944	98441301	chrA2	0.380952	0.483159	21	22	0.954545	AA	AA	AA	AC	CC	AC	AA	CC	AA	AC	CC	AA	AC	AA	AC	AC	AA	NA	CC	AA	CC	AA
36	chrA2.156696185	98453363	chrA2	0.5	0.514286	18	22	0.818182	GG	GG	GG	NA	AA	AA	AG	AA	NA	AG	AA	GG	NA	AG	AG	AA	AG	GG	AA	GG	NA	AG
37	chrA2.156702027	98459195	chrA2	0.309524	0.437863	21	22	0.954545	GG	GG	GG	GG	AA	AG	GG	AA	GG	AG	AA	GG	AA	GG	AG	AG	GG	AG	NA	GG	GG	GG
38	chrA2.156731327	98484903	chrA2	0.4	0.492308	20	22	0.909091	AA	AA	AG	AG	GG	GG	AG	GG	AG	AG	GG	AA	GG	AG	AG	GG	AG	GG	GG	AA	NA	NA
39	chrA2.156742036	98492954	chrA2	0.35	0.466667	20	22	0.909091	TT	TT	TT	AT	AA	AT	TT	AA	TT	AT	NA	TT	AA	TT	AT	TT	TT	AA	AA	TT	NA	TT
40	chrA2.156750012	98500216	chrA2	0.428571	0.501742	21	22	0.954545	AA	AA	AA	AG	GG	GG	AG	GG	AG	AG	GG	AA	GG	AG	AG	GG	AG	NA	GG	AA	AG	GG
41	chrA2.156781941	98525092	chrA2	0.394737	0.490754	19	22	0.863636	GG	GG	AG	AG	AA	AG	GG	AA	GG	NA	AA	GG	AA	GG	AG	NA	GG	AG	AA	GG	NA	GG
42	chrA2.156790475	98530308	chrA2	0.388889	0.488889	18	22	0.818182	GG	GG	AG	NA	AA	AA	AG	AA	AG	GG	NA	GG	AA	AG	AG	GG	GG	GG	NA	GG	NA	AG
43	chrA2.156798575	98540606	chrA2	0.394737	0.490754	19	22	0.863636	GG	GG	AG	NA	AA	AG	GG	AA	GG	AG	AA	GG	AA	GG	AG	NA	GG	NA	AA	GG	AG	GG
44	chrA2.156809352	98547132	chrA2	0.113636	0.206131	22	22	1	GG	GG	AG	GG	GG	AG	AG	GG	AG	GG	GG	GG	GG	AG	GG	GG	GG	GG	GG	GG	GG	GG
45	chrA2.156815846	98552348	chrA2	0.357143	0.470383	21	22	0.954545	GG	GG	GG	CG	CC	CG	GG	CC	GG	CG	CC	GG	CC	GG	CG	NA	GG	CG	CC	GG	GG	GG
46	chrA2.156821612	98558414	chrA2	0.472222	0.512698	18	22	0.818182	AA	AA	AA	NA	GG	GG	AG	GG	AG	AG	GG	AA	NA	NA	AG	AA	AA	NA	GG	AA	GG	AG
47	chrA2.156839039	98576051	chrA2	0.409091	0.494715	22	22	1	AA	AA	AA	AG	GG	GG	AG	GG	AG	AG	GG	AG	GG	AG	AG	GG	AG	AG	GG	AA	AG	GG
48	chrA2.156855178	98583634	chrA2	0.119048	0.214866	21	22	0.954545	GG	GG	GG	GG	GG	AG	AG	GG	AG	GG	GG	GG	GG	NA	GG	GG	AG	GG	GG	GG	GG	AG
49	chrA2.156862387	98590074	chrA2	0.210526	0.341394	19	22	0.863636	AA	AA	AG	NA	AA	AG	AG	AA	AG	NA	AA	AA	AA	AG	AA	GG	AG	AA	AA	AA	AA	NA
50	chrA2.156879411	98603930	chrA2	0.394737	0.490754	19	22	0.863636	AA	AA	AG	AG	GG	AG	AA	GG	AA	NA	NA	AA	AG	AA	AG	GG	AG	AG	GG	AA	NA	AA
51	chrA2.156889420	98613927	chrA2	0.368421	0.477952	19	22	0.863636	AA	AA	AA	AG	GG	AG	AA	GG	AA	AG	NA	AA	GG	AA	AG	NA	AA	AA	GG	AA	GG	NA
52	chrA2.156916209	98634725	chrA2	0.368421	0.477952	19	22	0.863636	GG	GG	GG	AG	AA	AG	GG	AA	GG	NA	AA	GG	NA	GG	AG	AA	GG	NA	AA	GG	AG	GG
53	chrA2.156931247	98646234	chrA2	0.5	0.513514	19	22	0.863636	AA	AA	AG	AG	GG	GG	AG	GG	AA	AG	GG	AA	GG	AG	AG	NA	AA	NA	GG	AA	NA	AG
54	chrA2.156951132	98663415	chrA2	0.475	0.511538	20	22	0.909091	AA	AA	AA	AG	GG	GG	AG	GG	AG	AG	GG	AA	NA	NA	AG	GG	AA	AG	GG	AA	AG	GG
55	chrA2.156955778	98668061	chrA2	0.368421	0.477952	19	22	0.863636	AA	AA	AA	AG	GG	AG	AA	GG	AA	NA	GG	AA	AG	AA	AG	NA	AA	NA	GG	AA	GG	AA
56	chrA2.156968029	98680582	chrA2	0.473684	0.512091	19	22	0.863636	AA	AA	NA	AT	TT	TT	AT	TT	AT	AT	AT	AT	NA	AT	AT	TT	AT	AT	NA	AA	AA	TT
57	chrA2.156979600	98692101	chrA2	0.113636	0.206131	22	22	1	CC	CC	CC	CC	CC	CG	CG	CC	CG	CC	CC	CC	CC	CG	CC	CC	CC	CC	CC	CC	CC	CG
58	chrA2.156992949	98704893	chrA2	0.421053	0.500711	19	22	0.863636	AA	AA	AC	AC	CC	CC	AC	CC	AC	AC	NA	AC	NA	AC	AC	CC	AC	AC	CC	AA	NA	CC
59	chrA2.157024175	98730781	chrA2	0.428571	0.501742	21	22	0.954545	AA	AA	AA	AT	TT	AT	AA	TT	AA	TT	TT	AA	TT	AA	AT	TT	AT	AA	TT	AA	AA	NA
60	chrA2.157039641	98744571	chrA2	0.380952	0.483159	21	22	0.954545	AA	AA	AA	AA	GG	GG	AG	AG	AG	AG	AA	AA	AA	AG	AG	GG	AG	AG	GG	AA	AA	NA
61	chrA2.157055786	98760486	chrA2	0.204545	0.332981	22	22	1	GG	GG	AG	AG	GG	GG	GG	AG	GG	GG	AG	AG	AA	GG	GG	GG	GG	GG	GG	GG	AG	AG
62	chrA2.157071780	98776774	chrA2	0.428571	0.501742	21	22	0.954545	AA	AA	AA	AG	GG	GG	AG	GG	AG	AG	GG	AA	GG	AG	AG	GG	AG	GG	GG	AA	AG	NA
63	chrA2.157105712	98802082	chrA2	0.272727	0.40592	22	22	1	GG	GG	GG	GG	AA	AG	GG	AG	GG	AG	AG	GG	GG	GG	AG	AA	AG	GG	AA	GG	GG	GG
64	chrA2.157111069	98807634	chrA2	0.105263	0.193457	19	22	0.863636	GG	GG	GG	GG	GG	AG	NA	GG	AG	NA	GG	GG	GG	AG	GG	GG	GG	NA	GG	GG	GG	AG
65	chrA2.157147616	98839600	chrA2	0.447368	0.507824	19	22	0.863636	GG	GG	GG	AG	AA	AA	NA	AA	AG	NA	AA	AG	AA	AG	AG	AA	AG	AG	AA	GG	GG	NA
66	chrA2.157164269	98849901	chrA2	0.113636	0.206131	22	22	1	GG	GG	GG	GG	GG	AG	AG	GG	AG	GG	GG	GG	GG	AG	GG	GG	GG	GG	GG	GG	GG	AG
67	chrA2.157182430	98863646	chrA2	0.421053	0.500711	19	22	0.863636	AA	AA	AG	NA	GG	GG	AG	GG	AG	NA	NA	AA	GG	AG	AG	GG	AG	AG	GG	AA	AG	GG
68	chrA2.157197888	98879101	chrA2	0.475	0.511538	20	22	0.909091	AA	AA	AG	AG	GG	GG	AG	GG	AG	AG	GG	AG	NA	AG	AG	AG	AG	AG	NA	AA	AG	AG
69	chrA2.157261432	98927478	chrA2	0.25	0.385714	18	22	0.818182	GG	GG	NA	GG	AA	AG	GG	NA	GG	AG	NA	GG	GG	GG	AG	NA	AG	AG	AA	GG	GG	GG
70	chrA2.157266452	98932498	chrA2	0.4	0.492308	20	22	0.909091	GG	GG	GG	AG	AA	AA	AA	AA	AG	AG	NA	AG	AA	AG	AG	AA	AG	AG	AA	GG	NA	AA
71	chrA2.157273831	98939878	chrA2	0.289474	0.422475	19	22	0.863636	AA	AA	AG	AA	GG	AG	AA	AG	AA	AG	NA	AA	AA	AA	AG	NA	AG	AG	GG	AA	NA	AA
72	chrA2.157278472	98944522	chrA2	0.368421	0.477952	19	22	0.863636	AA	AA	AG	AG	GG	GG	GG	GG	AG	NA	GG	AA	GG	AG	AG	NA	AG	NA	GG	AA	GG	GG
73	chrA2.157300282	98956464	chrA2	0.289474	0.422475	19	22	0.863636	AA	AA	AG	AA	GG	AG	AA	AA	AA	AG	AA	AA	NA	AA	AG	GG	AG	NA	GG	AA	NA	AA
1	chrB3.141292628	126081886	chrB3	0.285714	0.418118	21	22	0.954545	GG	AA	AG	GG	GG	GG	GG	AG	AG	GG	NA	GG	GG	GG	AG	GG	AG	AG	AA	AG	GG	AG
2	chrB3.141293750	126083008	chrB3	0.261905	0.396051	21	22	0.954545	GG	AA	NA	GG	GG	GG	GG	AG	AG	GG	GG	GG	GG	GG	AG	GG	AG	AG	AA	AG	GG	AG
3	chrB3.141294042	126083299	chrB3	0.333333	0.455285	21	22	0.954545	CC	AA	AC	CC	CC	CC	CC	AC	AC	CC	NA	CC	CC	CC	AC	CC	AC	AC	AA	AC	AA	AC
4	chrB3.141301918	126089356	chrB3	0.309524	0.437863	21	22	0.954545	AA	GG	AG	AA	AA	AA	AA	AG	AG	AA	AA	AA	AA	AA	AG	AA	AG	AG	GG	AG	GG	NA
5	chrB3.141304306	126091746	chrB3	0.309524	0.437863	21	22	0.954545	AA	GG	AA	AA	AA	AA	AA	AG	AG	AA	AA	AA	AA	AA	AG	AA	NA	AG	GG	AG	GG	GG
6	chrB3.141304802	126092242	chrB3	0.236842	0.371266	19	22	0.863636	AA	TT	AA	AA	AA	AA	AA	AT	AT	AA	AA	AA	AA	AA	AT	AA	NA	AT	TT	AT	NA	NA
7	chrB3.141309969	126097573	chrB3	0.25	0.385714	18	22	0.818182	GG	AA	NA	GG	GG	AG	GG	AG	AG	GG	GG	GG	GG	GG	NA	GG	AG	GG	AA	AG	NA	NA
8	chrB3.141310207	126097811	chrB3	0.295455	0.426004	22	22	1	AA	GG	AG	AA	AA	AG	AA	AG	AG	AA	AA	AA	AA	AA	AG	AA	AG	AG	GG	AG	AA	AG
9	chrB3.141312426	126100029	chrB3	0.318182	0.443975	22	22	1	AA	TT	AT	AA	AA	AT	AA	AT	AT	AA	AA	AA	AA	AA	AT	AA	AT	AT	TT	AT	AA	TT
10	chrB3.141338113	126119828	chrB3	0.277778	0.412698	18	22	0.818182	AA	GG	NA	AA	AA	AG	AA	AG	AG	AA	AA	AA	AA	AA	AG	AA	AG	NA	GG	AG	NA	NA
11	chrB3.141339292	126121007	chrB3	0.357143	0.470383	21	22	0.954545	AA	GG	AG	AA	AA	AG	AA	AG	AG	AA	AA	AA	NA	AA	AG	AA	AG	AG	GG	AG	GG	AG
12	chrB3.141339573	126121288	chrB3	0.333333	0.455285	21	22	0.954545	GG	AA	AG	GG	GG	AG	GG	AG	AG	GG	GG	GG	GG	GG	AG	GG	AG	NA	AA	AG	AA	AG
13	chrB3.141339773	126121488	chrB3	0.295455	0.426004	22	22	1	CC	AA	AC	CC	CC	AC	CC	AC	AC	CC	CC	CC	CC	CC	AC	CC	AC	AC	AA	AC	CC	AC
14	chrB3.141341569	126123284	chrB3	0.261905	0.396051	21	22	0.954545	GG	CC	GG	GG	GG	CG	GG	CG	CG	GG	GG	GG	GG	GG	CG	GG	CG	NA	CC	CG	GG	CG
15	chrB3.141342870	126124585	chrB3	0.289474	0.422475	19	22	0.863636	AA	GG	AA	NA	AA	AG	AA	AG	AG	NA	AA	AA	AA	AA	AG	AA	AG	NA	GG	AG	AA	AG
16	chrB3.141343189	126124904	chrB3	0.261905	0.396051	21	22	0.954545	GG	AA	AG	GG	GG	AG	GG	AG	AG	GG	GG	GG	GG	GG	AG	GG	AG	AG	NA	AG	GG	AG
17	chrB3.141346760	126128475	chrB3	0.340909	0.459831	22	22	1	AA	GG	AG	AA	AA	AG	AA	AG	AG	AA	AA	AA	AA	AA	AG	AA	AG	GG	GG	AG	AG	AG
18	chrB3.141356758	126138473	chrB3	0.325	0.45	20	22	0.909091	GG	AA	GG	GG	GG	AG	GG	AG	AG	GG	GG	GG	NA	GG	AG	NA	AG	AG	AA	AG	AG	AG
19	chrB3.141357274	126138988	chrB3	0.295455	0.426004	22	22	1	CC	AA	CC	CC	CC	AC	CC	AC	AC	CC	CC	CC	CC	CC	AC	AC	AC	AC	AA	AC	CC	AC
20	chrB3.141370451	126145374	chrB3	0.325	0.45	20	22	0.909091	AG	GG	AA	AA	AA	AG	AA	AA	AG	NA	AA	AA	NA	AA	AG	AA	AG	AG	GG	AG	AG	AG
21	chrB3.141373352	126148281	chrB3	0.318182	0.443975	22	22	1	AG	GG	AG	AA	AA	AG	AA	AA	AG	AA	AA	AA	AA	AA	AG	AA	AG	AG	GG	AG	AA	GG
22	chrB3.141378005	126152854	chrB3	0.272727	0.40592	22	22	1	AG	AA	GG	GG	GG	AG	GG	GG	AG	GG	GG	GG	GG	GG	AG	GG	AG	GG	AA	AG	AG	AG
23	chrB3.141379132	126153977	chrB3	0.333333	0.455285	21	22	0.954545	AG	AA	AG	GG	GG	AG	GG	GG	AG	GG	GG	GG	AA	GG	AG	GG	AG	GG	AA	AG	NA	AG
24	chrB3.141379488	126154332	chrB3	0.35	0.466667	20	22	0.909091	AC	AA	AC	CC	CC	AC	CC	CC	AC	CC	CC	CC	CC	CC	AC	NA	AC	NA	AA	AC	AA	AC
25	chrB3.141387296	126156438	chrB3	0.35	0.466667	20	22	0.909091	AG	AA	AG	GG	GG	AG	GG	GG	AG	NA	GG	GG	GG	GG	AG	GG	AG	AG	AA	AG	AA	NA
26	chrB3.141388695	126157816	chrB3	0.363636	0.473573	22	22	1	AC	CC	AC	AA	AA	AC	AA	AA	AC	AA	AA	AA	AA	AA	AC	AA	AC	AC	CC	AC	CC	CC
27	chrB3.141389629	126158750	chrB3	0.285714	0.418118	21	22	0.954545	AC	AA	AC	CC	CC	AC	CC	CC	AC	CC	CC	CC	CC	CC	AC	CC	AC	AC	AA	AC	CC	NA
28	chrB3.141389866	126158987	chrB3	0.295455	0.426004	22	22	1	AG	AA	AG	GG	GG	AG	GG	GG	AG	GG	GG	GG	GG	GG	AG	GG	AG	AG	AA	AG	GG	AG
29	chrB3.141390889	126160010	chrB3	0.333333	0.457143	18	22	0.818182	AG	GG	AG	AA	AA	AG	AA	AA	NA	GG	AA	AA	AA	AA	AG	AA	AG	NA	GG	AG	NA	NA
30	chrB3.141391073	126160194	chrB3	0.25	0.384615	20	22	0.909091	AG	AA	GG	GG	GG	AG	GG	GG	AG	GG	GG	GG	GG	GG	AG	GG	AG	GG	AA	AG	NA	NA
31	chrB3.141396876	126165997	chrB3	0.210526	0.341394	19	22	0.863636	AA	TT	AA	AA	AA	NA	AA	AA	AT	AA	AA	AA	AA	AA	NA	AA	AT	AA	TT	AT	AT	NA
32	chrB3.141424231	126186658	chrB3	0.236842	0.371266	19	22	0.863636	AA	CC	AA	AA	AA	AC	AA	AA	AC	AA	AA	AA	AA	AA	AC	AA	AC	NA	CC	AC	NA	NA
33	chrB3.141435835	126198260	chrB3	0.238095	0.371661	21	22	0.954545	GG	GG	GG	AG	AA	AA	GG	AG	GG	GG	GG	GG	NA	AG	AG	AG	AG	GG	GG	GG	GG	GG
34	chrB3.141446190	126200953	chrB3	0.261905	0.396051	21	22	0.954545	GG	GG	AG	AG	AA	AA	GG	AG	GG	GG	GG	GG	AG	AG	AG	NA	AG	GG	GG	GG	GG	GG
35	chrB3.141451822	126206600	chrB3	0.285714	0.418118	21	22	0.954545	GG	AA	GG	GG	GG	GG	GG	GG	AA	GG	GG	GG	GG	AG	AG	GG	AG	AA	AG	AA	NA	GG
36	chrB3.141456765	126211618	chrB3	0.318182	0.443975	22	22	1	GG	AA	GG	GG	GG	GG	GG	GG	AA	GG	GG	GG	GG	AG	AG	GG	AG	AA	AG	AA	AA	GG
37	chrB3.141464881	126217550	chrB3	0.333333	0.455285	21	22	0.954545	AA	GG	AA	AA	AA	AA	AA	AA	GG	AA	NA	AA	AA	AG	AG	AA	AG	GG	AG	GG	GG	AA
38	chrB3.141474993	126227661	chrB3	0.272727	0.40592	22	22	1	AG	GG	GG	AG	AA	AA	GG	AG	GG	GG	GG	GG	AG	AG	AG	AG	AG	GG	GG	GG	GG	GG
39	chrB3.141481292	126233959	chrB3	0.272727	0.40592	22	22	1	GG	GG	GG	AG	AA	AA	GG	AG	GG	GG	GG	GG	AG	AG	AG	AG	AG	GG	GG	GG	AG	GG
40	chrB3.141488710	126236664	chrB3	0.340909	0.459831	22	22	1	AG	GG	AG	AG	GG	GG	AA	AG	GG	GG	AA	AA	AG	GG	GG	AG	GG	GG	AG	GG	GG	AA
41	chrB3.141498065	126244486	chrB3	0.125	0.224359	20	22	0.909091	AA	CC	CC	CC	CC	CC	CC	CC	NA	CC	CC	AC	CC	CC	CC	AC	AC	CC	NA	CC	CC	CC
42	chrB3.141509898	126256650	chrB3	0.236842	0.371266	19	22	0.863636	AG	GG	AA	AA	AA	AA	AA	AA	AG	NA	AA	AG	AA	AA	AA	GG	AG	NA	AA	AG	NA	AA
43	chrB3.141515150	126261673	chrB3	0.225	0.357692	20	22	0.909091	AG	GG	GG	GG	GG	AA	GG	AG	AG	NA	GG	AG	NA	GG	GG	AA	AG	GG	GG	GG	GG	GG
44	chrB3.141553607	126292656	chrB3	0.289474	0.422475	19	22	0.863636	AC	AA	NA	AC	CC	AA	AC	AC	CC	CC	NA	CC	NA	CC	CC	AC	CC	AC	CC	AC	CC	CC
45	chrB3.141566288	126308138	chrB3	0.225	0.357692	20	22	0.909091	AA	GG	AG	AA	AA	GG	AA	AG	AA	AA	AA	AA	AG	AA	AA	AA	AA	AG	AA	AG	NA	NA
46	chrB3.141572838	126314688	chrB3	0.210526	0.341394	19	22	0.863636	AG	GG	AG	AG	AA	AA	AG	AA	AA	AA	AG	AA	NA	AA	AA	NA	AA	NA	AA	AG	AA	AA
47	chrB3.141580605	126319737	chrB3	0.261905	0.396051	21	22	0.954545	GG	AA	GG	NA	GG	AA	AG	AG	GG	GG	AG	GG	AA	GG	GG	GG	GG	AG	GG	AG	GG	GG
48	chrB3.141586725	126325857	chrB3	0.159091	0.273784	22	22	1	AG	AA	AG	AA	AA	AA	AA	AA	AG	AA	AA	AG	AG	AA	AA	AG	AG	AA	AA	AA	AA	AA
49	chrB3.141597397	126336853	chrB3	0.452381	0.507549	21	22	0.954545	AG	AA	GG	AG	GG	AA	AA	AG	AG	GG	AG	AG	AG	GG	GG	GG	AG	NA	AG	AG	AG	AA
50	chrB3.141609366	126348820	chrB3	0.477273	0.510571	22	22	1	AG	GG	AA	AG	AA	GG	AG	AG	AG	AA	AG	AG	GG	AA	AA	GG	AG	GG	AG	AG	GG	AG
51	chrB3.141616234	126352638	chrB3	0.404762	0.493612	21	22	0.954545	AA	GG	AG	AG	GG	AA	AG	AG	AG	NA	AG	AG	AA	GG	GG	AG	AG	GG	AG	GG	GG	AG
52	chrB3.141622152	126358555	chrB3	0.261905	0.396051	21	22	0.954545	AC	CC	CC	CC	CC	AA	CC	AC	AC	CC	CC	AC	AC	CC	CC	NA	AC	CC	AA	CC	CC	AC
53	chrB3.141626591	126362378	chrB3	0.333333	0.455285	21	22	0.954545	AG	AA	AG	AA	AA	GG	GG	AG	AG	AA	AG	AG	GG	AA	AA	AA	AG	AA	AG	AA	AA	NA
54	chrB3.141648976	126382799	chrB3	0.227273	0.359408	22	22	1	AG	GG	AG	GG	GG	AA	GG	AG	AG	GG	GG	AG	AG	GG	GG	GG	AG	GG	AG	GG	GG	GG
55	chrB3.141657636	126391455	chrB3	0.363636	0.473573	22	22	1	AA	TT	TT	AT	TT	AA	AA	AT	AT	TT	AA	AT	AA	TT	TT	TT	AT	TT	AT	TT	TT	TT
56	chrB3.141668705	126402520	chrB3	0.113636	0.206131	22	22	1	AG	GG	GG	AG	GG	GG	AG	GG	GG	GG	AG	GG	AG	GG	GG	GG	GG	GG	GG	GG	GG	GG
57	chrB3.141684303	126418045	chrB3	0.315789	0.443812	19	22	0.863636	AC	AA	AC	AA	AA	CC	NA	AC	AC	AA	AA	AC	AC	AA	AA	NA	AC	NA	AC	AC	AA	AC
58	chrB3.141697552	126426182	chrB3	0.125	0.224359	20	22	0.909091	AG	AA	AG	AA	AA	AA	AA	AA	AG	AA	AA	AG	NA	AA	AA	NA	AG	AA	AA	AA	AA	AA
59	chrB3.141705957	126434664	chrB3	0.4	0.492308	20	22	0.909091	AG	AA	AG	AG	AA	GG	GG	AG	AG	NA	AG	AG	NA	AA	AA	AG	AG	AA	AG	AG	AA	AG
60	chrB3.141712222	126439223	chrB3	0.238095	0.371661	21	22	0.954545	CC	GG	GG	CG	GG	GG	CC	GG	CG	GG	CG	CG	CG	GG	GG	NA	CG	GG	GG	GG	GG	GG
61	chrB3.141733072	126454593	chrB3	0.119048	0.214866	21	22	0.954545	AA	GG	GG	GG	GG	GG	GG	GG	AG	GG	GG	AG	GG	GG	GG	NA	AG	GG	GG	GG	GG	GG
62	chrB3.141737994	126459513	chrB3	0.261905	0.396051	21	22	0.954545	AG	GG	GG	GG	GG	AA	GG	AG	AG	GG	GG	AG	AG	GG	GG	NA	AG	GG	AG	AG	GG	AG
63	chrB3.141746648	126462355	chrB3	0.447368	0.507824	19	22	0.863636	GG	AA	NA	AG	AA	GG	GG	NA	AG	AA	AG	AG	GG	AA	AA	NA	AG	AA	AG	AG	AA	GG
64	chrB3.141752993	126471524	chrB3	0.447368	0.507824	19	22	0.863636	GG	AA	NA	AG	AA	GG	GG	AG	AG	AA	NA	AG	GG	AA	AA	GG	AG	AA	AG	AG	AA	NA
65	chrB3.141762932	126481454	chrB3	0.175	0.296154	20	22	0.909091	AA	GG	GG	AG	GG	GG	AG	GG	GG	GG	GG	GG	AG	GG	GG	AA	NA	GG	GG	GG	NA	GG
66	chrB3.141786226	126491564	chrB3	0.368421	0.477952	19	22	0.863636	GG	AA	AG	AG	AA	GG	NA	AG	AG	AA	AA	AG	NA	AA	AA	GG	AG	AA	AG	AG	AA	NA
67	chrB3.141790749	126496082	chrB3	0.105263	0.193457	19	22	0.863636	AA	GG	GG	AG	GG	GG	NA	GG	GG	GG	NA	GG	GG	GG	GG	NA	AG	GG	GG	GG	GG	GG
68	chrB3.141805539	126505805	chrB3	0.238095	0.371661	21	22	0.954545	TT	AA	AT	AT	AA	AA	TT	AA	AA	AA	AT	AA	TT	AA	AA	AA	AT	AA	AA	AA	NA	AA
69	chrB3.141815041	126515300	chrB3	0.416667	0.5	18	22	0.818182	GG	AA	AG	AG	AA	GG	GG	AG	AG	AA	AG	AG	NA	AA	AA	AG	AG	AA	NA	AG	NA	NA
70	chrB3.141822680	126521015	chrB3	0.35	0.466667	20	22	0.909091	AG	GG	NA	AG	GG	AA	AA	NA	AG	GG	GG	AG	AA	GG	GG	AG	AG	GG	AG	AG	GG	GG
71	chrB3.141828327	126526684	chrB3	0.4	0.492308	20	22	0.909091	GG	AA	AG	AG	AA	GG	GG	NA	AA	AA	AG	AG	GG	AA	AA	GG	AG	AA	AG	AA	AA	NA
72	chrB3.141842922	126539084	chrB3	0.447368	0.507824	19	22	0.863636	GG	AA	AG	NA	AA	GG	GG	AG	AG	AA	AG	AG	GG	AA	AA	AA	AG	NA	AG	AG	NA	AG
73	chrB3.141848184	126544346	chrB3	0.214286	0.344948	21	22	0.954545	CC	CC	CG	CC	CC	GG	CC	CG	CG	CC	CC	CG	NA	CC	CC	CC	CC	CC	CG	CG	CC	CG
74	chrB3.141867020	126557586	chrB3	0.111111	0.203175	18	22	0.818182	AA	GG	GG	NA	GG	GG	AG	GG	GG	GG	NA	GG	NA	GG	GG	NA	AG	GG	GG	GG	GG	GG
75	chrB3.141893045	126578547	chrB3	0.119048	0.214866	21	22	0.954545	AG	GG	GG	AG	GG	GG	AG	GG	GG	GG	AG	GG	NA	GG	GG	GG	AG	GG	GG	GG	GG	GG
76	chrB3.141896670	126582173	chrB3	0.425	0.501282	20	22	0.909091	AA	GG	AG	AG	GG	AA	AA	AG	AG	GG	NA	AG	AA	GG	GG	GG	AG	GG	AG	AG	NA	AG
77	chrB3.141914833	126596012	chrB3	0.125	0.224359	20	22	0.909091	AG	AA	AA	AG	AA	AA	AG	AA	AA	AA	NA	AA	NA	AA	AA	AG	AG	AA	AA	AA	AA	AA
78	chrB3.141919775	126600761	chrB3	0.421053	0.500711	19	22	0.863636	GG	AA	AG	AG	AA	GG	GG	AG	AG	AA	NA	AG	NA	AA	AA	AG	AG	AA	AG	AG	NA	AG
79	chrB3.141935184	126618184	chrB3	0.142857	0.250871	21	22	0.954545	CC	AA	AA	AC	AA	AA	AC	AA	AA	AA	AA	AA	AC	AA	AA	NA	AC	AA	AA	AA	AA	AA
80	chrB3.142025362	126685817	chrB3	0.309524	0.437863	21	22	0.954545	AC	CC	AC	CC	CC	AA	AA	AC	NA	CC	AC	AC	AC	CC	CC	CC	CC	CC	AC	AC	CC	AC
81	chrB3.142062971	126716709	chrB3	0.357143	0.470383	21	22	0.954545	GG	AA	AG	AA	AA	GG	GG	AG	NA	AG	AG	AG	AA	AA	AA	AA	AG	AA	AG	AG	AA	AG
82	chrB3.142071639	126725379	chrB3	0.473684	0.512091	19	22	0.863636	GG	AG	AG	AA	NA	GG	AG	AG	AG	NA	GG	AG	AG	NA	AA	GG	AG	AG	AG	AG	AA	AG
83	chrB3.142086410	126738668	chrB3	0.363636	0.473573	22	22	1	GG	AA	AG	AA	AA	GG	GG	AG	AG	AA	AG	AG	AG	AA	AA	AA	AG	AA	AG	AG	AA	AG
84	chrB3.142170306	126800669	chrB3	0.204545	0.332981	22	22	1	AA	GG	AA	AA	AA	AA	AG	AA	AA	AA	AG	AA	AA	AA	AA	AA	AG	GG	AA	AA	GG	AA
85	chrB3.142192330	126817392	chrB3	0.47619	0.511034	21	22	0.954545	AG	AA	AG	GG	GG	AA	AA	AG	AG	GG	AG	AG	AG	GG	GG	NA	AG	AA	AG	AG	AG	AG
86	chrB3.142213817	126834432	chrB3	0.473684	0.512091	19	22	0.863636	GG	GG	AG	AA	AA	GG	GG	AG	AG	AA	NA	AG	GG	AA	AA	NA	AG	GG	AG	AG	AG	NA
87	chrB3.142218092	126838591	chrB3	0.210526	0.341394	19	22	0.863636	AG	AA	AA	AA	AA	GG	AA	AG	AG	AA	AA	AG	AG	AA	AA	AA	AA	AA	NA	AG	NA	NA
88	chrB3.142239876	126859181	chrB3	0.5	0.513514	19	22	0.863636	CC	CC	NA	GG	GG	CC	CC	CG	CG	GG	NA	CG	CG	GG	GG	CG	CG	CC	CG	CG	NA	CG
1	chrC2.5010505	4360303	chrC2	0.416667	0.5	18	22	0.818182	AG	AG	NA	AA	AA	AG	AG	AG	AG	AA	GG	AG	AA	AA	GG	NA	AG	GG	AG	AA	NA	NA
2	chrC2.5013551	4363348	chrC2	0.181818	0.30444	22	22	1	AA	AA	AA	AG	AA	AG	AA	AG	AA	AA	AA	AG	AG	AA	AA	GG	AA	AA	AA	AA	AA	AG
3	chrC2.5016238	4366022	chrC2	0.4	0.492308	20	22	0.909091	AG	AG	AA	GG	GG	AG	AG	AA	AG	GG	AA	AA	GG	AG	AA	NA	AA	AA	AG	AG	NA	AA
4	chrC2.5017605	4367389	chrC2	0.275	0.408974	20	22	0.909091	AC	AC	AC	AA	AA	AA	AA	AA	AC	AA	CC	AC	NA	AA	AC	AA	AC	AA	AC	AA	NA	AC
5	chrC2.5018779	4368563	chrC2	0.181818	0.30444	22	22	1	AA	AA	AG	AA	AA	AA	AG	AA	AG	AA	AG	AA	AA	AA	AG	AA	AG	AA	AG	AA	AG	AA
6	chrC2.5019920	4369704	chrC2	0.181818	0.30444	22	22	1	CC	CC	AC	CC	CC	CC	AC	CC	AC	CC	AA	CC	CC	CC	AC	CC	AC	CC	AC	CC	CC	CC
7	chrC2.5020879	4370664	chrC2	0.113636	0.206131	22	22	1	CC	CC	CC	CC	CC	CG	CC	CG	CC	CC	CC	CC	CC	CC	CC	CC	CC	CG	CC	CC	GG	CC
8	chrC2.5022401	4372124	chrC2	0.236842	0.371266	19	22	0.863636	GG	GG	GG	AA	AA	GG	AG	AG	AG	NA	GG	GG	GG	GG	GG	NA	GG	GG	AG	AG	NA	GG
9	chrC2.5032548	4377620	chrC2	0.342105	0.462304	19	22	0.863636	AA	AA	NA	AA	AA	AG	AA	AG	AG	AA	AA	AG	AA	NA	AG	AA	GG	GG	NA	AG	GG	AG
10	chrC2.5037983	4383038	chrC2	0.35	0.466667	20	22	0.909091	GG	GG	GG	CC	CC	CG	CC	GG	CG	CC	CC	GG	CG	CG	GG	GG	GG	NA	GG	GG	NA	GG
11	chrC2.5040706	4385761	chrC2	0.409091	0.494715	22	22	1	GG	GG	AA	GG	GG	AA	GG	AG	AG	AG	GG	AG	GG	GG	AG	GG	AA	AA	AA	AG	AA	GG
12	chrC2.5042148	4387203	chrC2	0.138889	0.246032	18	22	0.818182	AG	AG	AA	AA	AA	AA	AA	AA	AA	AG	NA	AG	AA	AG	AA	NA	AA	AA	AA	AA	NA	NA
13	chrC2.5046764	4391812	chrC2	0.452381	0.507549	21	22	0.954545	AG	AG	AA	GG	GG	AG	GG	AG	AG	AG	AA	AA	GG	AG	AG	GG	AA	AA	AA	AG	NA	AA
14	chrC2.5074647	4405508	chrC2	0.388889	0.488889	18	22	0.818182	AA	AA	NA	GG	GG	GG	AG	NA	GG	GG	NA	AA	AA	AG	AG	AA	GG	GG	GG	AG	NA	GG
15	chrC2.5083635	4414484	chrC2	0.227273	0.359408	22	22	1	AG	AG	GG	GG	GG	AG	GG	AG	AG	GG	GG	GG	AA	GG	AG	GG	AG	GG	GG	AG	GG	GG
16	chrC2.5095692	4423026	chrC2	0.214286	0.344948	21	22	0.954545	AG	AG	GG	GG	GG	GG	AG	GG	GG	GG	GG	AG	AA	GG	GG	NA	AG	AA	GG	GG	GG	GG
17	chrC2.5133750	4457896	chrC2	0.5	0.512195	21	22	0.954545	GG	GG	AA	AG	GG	AG	AA	AG	AG	GG	GG	AA	GG	AA	AG	AA	GG	AG	AA	AG	NA	AA
18	chrC2.5146916	4471058	chrC2	0.25	0.383721	22	22	1	GG	AG	AA	AG	GG	AA	AA	AA	AA	AA	AA	AA	AG	AA	AA	AA	AG	AG	AA	AA	GG	AA
19	chrC2.5184545	4487622	chrC2	0.428571	0.501742	21	22	0.954545	AA	AA	GG	NA	AA	AG	GG	AA	AG	AG	AA	GG	AG	GG	GG	GG	AG	AG	GG	GG	AA	GG
20	chrC2.5196754	4499186	chrC2	0.236842	0.371266	19	22	0.863636	GG	AA	AA	AG	GG	AA	AA	AA	AA	NA	NA	AA	AG	AA	AA	AA	AG	AG	AA	AA	AG	NA
21	chrC2.5202556	4504985	chrC2	0.138889	0.246032	18	22	0.818182	GG	AG	GG	GG	GG	AG	NA	AG	GG	GG	AA	GG	NA	GG	GG	NA	GG	GG	GG	GG	NA	GG
22	chrC2.5233563	4527776	chrC2	0.119048	0.214866	21	22	0.954545	AA	AA	AG	AA	AA	AG	AG	AA	AA	AA	AA	AA	AA	AA	AG	AA	AA	AA	AG	AA	NA	AA
23	chrC2.5244502	4541914	chrC2	0.261905	0.396051	21	22	0.954545	AA	GG	NA	AG	AA	GG	AG	GG	GG	AG	GG	GG	GG	GG	AG	GG	AG	AG	AG	GG	GG	GG
24	chrC2.5280695	4569733	chrC2	0.15	0.261538	20	22	0.909091	TT	AA	AA	AA	AA	AA	AA	AA	AA	AA	AA	AA	AA	AA	AT	NA	AT	AT	AT	AA	NA	AA
25	chrC2.5291135	4578081	chrC2	0.275	0.408974	20	22	0.909091	AA	AC	AA	CC	CC	CC	AA	AA	AA	CC	AC	AC	AA	AA	AA	AA	AA	NA	AA	AA	NA	AA
26	chrC2.5297983	4584597	chrC2	0.157895	0.273115	19	22	0.863636	GG	AA	AA	AA	AA	AA	AA	AA	AA	AG	NA	AA	AA	AA	AG	AA	AG	AA	AG	AA	NA	NA
27	chrC2.5302201	4588730	chrC2	0.142857	0.250871	21	22	0.954545	GG	GG	GG	AG	AA	AG	GG	GG	GG	AG	AG	GG	GG	GG	GG	GG	GG	GG	GG	GG	NA	GG
28	chrC2.5314368	4600968	chrC2	0.214286	0.344948	21	22	0.954545	CC	CC	AA	CC	CC	CC	AC	CC	CC	CC	CC	AC	AC	AC	CC	AC	CC	CC	AC	AC	NA	CC
29	chrC2.5340023	4615298	chrC2	0.45	0.507692	20	22	0.909091	AA	AC	AC	AC	AA	AC	CC	CC	AA	AC	AA	AC	NA	CC	AC	CC	CC	AA	CC	AC	NA	CC
30	chrC2.5352908	4628653	chrC2	0.236842	0.371266	19	22	0.863636	AA	GG	GG	GG	GG	AG	GG	GG	AA	GG	NA	GG	GG	GG	AG	NA	GG	AG	AG	AG	NA	GG
31	chrC2.5360018	4635750	chrC2	0.275	0.408974	20	22	0.909091	GG	AA	AG	AA	AA	AG	AG	AA	AG	AA	NA	AG	AG	AA	AG	AA	AG	AA	AG	AA	NA	AA
32	chrC2.5397331	4659682	chrC2	0.3	0.430769	20	22	0.909091	GG	GG	NA	AG	GG	GG	AG	AG	AG	GG	GG	AG	AA	AA	GG	AA	AG	GG	NA	GG	GG	GG
33	chrC2.5405122	4667470	chrC2	0.4	0.492308	20	22	0.909091	AA	AA	CC	CC	AA	AA	CC	AA	AC	CC	AA	AC	CC	CC	AA	AA	AC	NA	AA	AA	NA	AC
34	chrC2.5409682	4670411	chrC2	0.5	0.512195	21	22	0.954545	GG	GG	AA	AG	GG	GG	AA	GG	AG	AA	GG	AG	AA	AA	AG	AA	AA	GG	AG	GG	AA	NA
35	chrC2.5416346	4678517	chrC2	0.113636	0.206131	22	22	1	AA	GG	GG	GG	GG	GG	GG	GG	AG	GG	AA	GG	GG	GG	GG	GG	GG	GG	GG	GG	GG	GG
36	chrC2.5423153	4685255	chrC2	0.236842	0.371266	19	22	0.863636	GG	AA	GG	NA	AA	GG	GG	GG	GG	AA	GG	GG	GG	GG	GG	GG	AG	NA	NA	AA	GG	GG
37	chrC2.5484848	4737698	chrC2	0.204545	0.332981	22	22	1	CG	CG	CC	GG	GG	CC	GG	GG	CG	GG	GG	GG	GG	GG	GG	GG	GG	CC	GG	GG	GG	GG
38	chrC2.5510515	4757738	chrC2	0.113636	0.206131	22	22	1	GG	GG	GG	AG	AA	AG	GG	GG	GG	AG	GG	GG	GG	GG	GG	GG	GG	GG	GG	GG	GG	GG
39	chrC2.5515787	4763010	chrC2	0.325	0.45	20	22	0.909091	AA	AA	AA	AG	GG	AG	AA	AA	AA	NA	AA	AG	GG	AA	AG	AG	AA	NA	GG	AG	AA	AG
40	chrC2.5532419	4781781	chrC2	0.194444	0.322222	18	22	0.818182	AA	AA	AA	AA	AA	AA	AA	AA	AA	AG	NA	AG	AG	AA	NA	NA	AA	AA	GG	AG	NA	AG
41	chrC2.5559608	4807211	chrC2	0.35	0.466667	20	22	0.909091	AC	AA	AA	AC	CC	AC	AA	AC	AA	NA	AA	AC	AC	AA	AC	AA	AA	NA	CC	AC	AC	AC
42	chrC2.5578856	4826401	chrC2	0.363636	0.473573	22	22	1	GG	GG	GG	CG	GG	GG	CC	GG	CC	GG	CC	GG	CG	CG	CG	CC	CC	GG	GG	CG	CG	GG
43	chrC2.5582802	4830347	chrC2	0.325	0.45	20	22	0.909091	GG	GG	GG	AA	AA	AG	AA	AG	AA	AA	AA	AG	NA	AG	AA	AA	AA	GG	AA	AA	NA	AG
44	chrC2.5601703	4839934	chrC2	0.285714	0.418118	21	22	0.954545	GG	GG	GG	AG	GG	GG	AA	GG	AA	GG	AA	GG	GG	AG	AG	NA	AA	GG	GG	AG	GG	GG
45	chrC2.5610904	4849134	chrC2	0.25	0.383721	22	22	1	CC	AC	AA	CC	CC	AC	CC	AA	CC	CC	CC	AC	CC	AC	CC	CC	CC	AA	CC	CC	CC	AC
46	chrC2.5626885	4861893	chrC2	0.363636	0.473573	22	22	1	CC	AA	AA	AC	CC	AA	AA	AA	AA	CC	AA	AC	AC	AA	AC	AA	AC	AA	CC	AC	AA	CC
47	chrC2.5634011	4869017	chrC2	0.375	0.480769	20	22	0.909091	AA	AG	GG	AG	GG	GG	AA	GG	AG	GG	NA	GG	AA	AG	AG	GG	AG	GG	NA	AG	AA	GG
48	chrC2.5639350	4874356	chrC2	0.136364	0.241015	22	22	1	GG	GG	GG	GG	GG	AG	GG	GG	GG	AG	GG	GG	GG	GG	AG	GG	AG	GG	AG	AG	GG	GG
49	chrC2.5660662	4887802	chrC2	0.204545	0.332981	22	22	1	AA	AA	AA	AG	GG	AG	AA	AA	AG	AG	AA	AG	AG	AA	AA	AA	AA	AA	AA	AA	AA	AG
50	chrC2.5668503	4895641	chrC2	0.131579	0.234708	19	22	0.863636	GG	GG	GG	NA	AA	GG	GG	GG	AG	AG	GG	NA	NA	GG	GG	GG	GG	GG	GG	GG	GG	AG
51	chrC2.5690530	4910778	chrC2	0.363636	0.473573	22	22	1	AT	AA	AA	AT	TT	AT	AA	AA	AT	TT	AT	AT	TT	AA	AT	AA	AA	AA	AT	AT	AA	AT
52	chrC2.5852517	5044427	chrC2	0.190476	0.315912	21	22	0.954545	AG	GG	AA	GG	GG	AG	GG	GG	GG	AG	GG	GG	GG	GG	GG	NA	GG	AA	GG	GG	GG	AG
53	chrC2.5899089	5085917	chrC2	0.305556	0.436508	18	22	0.818182	AA	AA	AT	AA	AA	NA	AT	AA	AT	AT	AA	AA	AA	NA	TT	TT	AA	NA	AT	AA	TT	NA
1	chrD1.77466559	50348845	chrD1	0.119048	0.214866	21	22	0.954545	AA	GG	AA	AG	AG	AA	AA	AA	AA	AG	AA	AA	AA	AA	AA	AA	AA	AA	AA	AA	NA	AA
2	chrD1.77471878	50350894	chrD1	0.105263	0.193457	19	22	0.863636	CC	CC	CC	CC	AC	CC	CC	CC	CC	CC	CC	AC	NA	NA	AC	CC	CC	NA	CC	AC	CC	CC
3	chrD1.77477100	50356149	chrD1	0.2	0.328205	20	22	0.909091	AA	AA	AA	AA	AC	AA	AA	AA	AA	AA	NA	AC	AC	AC	AC	AA	AA	CC	AA	AC	NA	AA
4	chrD1.77478943	50357992	chrD1	0.190476	0.315912	21	22	0.954545	GG	GG	GG	GG	AG	GG	GG	GG	GG	GG	GG	AG	AG	AG	AG	AG	GG	AG	GG	AG	NA	GG
5	chrD1.77479682	50358731	chrD1	0.204545	0.332981	22	22	1	GG	GG	GG	GG	AG	GG	GG	GG	GG	GG	GG	AG	AG	AG	AG	AG	GG	AG	GG	AG	AG	GG
6	chrD1.77485320	50364466	chrD1	0.204545	0.332981	22	22	1	AA	AA	AA	AA	AG	AA	AA	AA	AA	AA	AA	AG	AG	AG	AG	AA	AA	AG	AA	AG	GG	AA
7	chrD1.77495039	50370899	chrD1	0.190476	0.315912	21	22	0.954545	CC	CC	CC	CC	CG	CC	CC	CC	CC	CC	CC	CG	CG	CG	CG	CG	CC	CG	CC	CG	NA	CC
8	chrD1.77500978	50377747	chrD1	0.238095	0.371661	21	22	0.954545	GG	AG	GG	GG	AG	GG	GG	GG	GG	GG	GG	AG	NA	AG	AG	AA	GG	GG	GG	AG	AA	GG
9	chrD1.77505867	50382639	chrD1	0.25	0.383721	22	22	1	GG	AG	GG	AG	AA	GG	GG	GG	GG	AG	GG	AG	GG	AG	AG	AG	GG	AG	GG	AG	GG	GG
10	chrD1.77512084	50384933	chrD1	0.357143	0.470383	21	22	0.954545	AA	GG	AA	AG	GG	AA	AA	AA	AA	AG	AA	AG	NA	AG	AG	GG	AA	AG	AA	AG	GG	AA
11	chrD1.77518386	50389952	chrD1	0.285714	0.418118	21	22	0.954545	TT	AT	AA	AA	AT	AA	AA	AA	AA	AA	AA	AT	AT	AT	AT	TT	AA	AT	AA	AT	NA	AA
12	chrD1.77529748	50401021	chrD1	0.113636	0.206131	22	22	1	AA	AT	AA	AT	AT	AA	AA	AA	AA	AT	AA	AA	AA	AA	AA	AT	AA	AA	AA	AA	AA	AA
13	chrD1.77538178	50408586	chrD1	0.340909	0.459831	22	22	1	GG	AG	AA	AG	GG	AA	AA	AA	AA	AG	AA	AG	AG	AA	AG	AG	AA	GG	AA	AG	AG	AA
14	chrD1.77542335	50412744	chrD1	0.2	0.328205	20	22	0.909091	AA	AG	GG	GG	AG	GG	GG	GG	GG	GG	GG	AG	GG	GG	AG	NA	GG	NA	GG	AG	AG	GG
15	chrD1.77549456	50419861	chrD1	0.25	0.384615	20	22	0.909091	AA	AA	CC	NA	AA	CC	CC	CC	CC	CC	CC	AC	CC	CC	AC	AC	CC	AC	CC	NA	CC	CC
16	chrD1.77552770	50423041	chrD1	0.277778	0.412698	18	22	0.818182	GG	AG	GG	NA	AA	GG	GG	GG	GG	AG	GG	AG	AG	NA	AG	NA	GG	AA	GG	AG	NA	GG
17	chrD1.77558493	50427997	chrD1	0.159091	0.273784	22	22	1	AA	GG	AA	AG	AG	AA	AA	AA	AA	AG	AA	AA	AG	AA	AA	AA	AA	AA	AA	AA	AG	AA
18	chrD1.77561059	50430563	chrD1	0.309524	0.437863	21	22	0.954545	AA	AC	CC	AC	AA	CC	CC	CC	CC	AC	CC	AC	AC	AC	AC	CC	CC	NA	CC	AC	AC	CC
19	chrD1.77562765	50432268	chrD1	0.214286	0.344948	21	22	0.954545	AA	AA	AA	AA	AG	AA	AA	AA	AA	AA	AA	AG	AG	AG	AG	NA	AA	GG	AA	AG	AG	AA
20	chrD1.77563704	50433207	chrD1	0.361111	0.474603	18	22	0.818182	AA	AA	GG	GG	AG	GG	GG	GG	GG	AG	NA	AG	NA	NA	AG	AA	GG	AA	GG	AG	NA	GG
21	chrD1.77565266	50434770	chrD1	0.261905	0.396051	21	22	0.954545	GG	AA	GG	GG	AG	GG	GG	GG	GG	GG	GG	AG	AG	AG	AG	AA	GG	AG	GG	AG	NA	GG
22	chrD1.77624774	50476619	chrD1	0.295455	0.426004	22	22	1	AA	AC	AA	AA	AA	AC	AC	AC	AA	AC	AA	AC	AA	AC	AC	AC	AC	AA	AC	AA	AA	CC
23	chrD1.77631915	50481715	chrD1	0.263158	0.398293	19	22	0.863636	AA	AA	AA	NA	AG	AA	AA	AA	AG	NA	AA	AG	GG	AA	AA	AG	NA	GG	AA	AA	GG	AA
24	chrD1.77652551	50503035	chrD1	0.25	0.384615	20	22	0.909091	CC	CC	CC	AA	AA	CC	CC	CC	AC	NA	CC	AC	AC	CC	CC	AC	CC	AA	CC	CC	NA	CC
25	chrD1.77658360	50508840	chrD1	0.25	0.383721	22	22	1	GG	GG	GG	AG	AG	GG	GG	GG	AG	GG	GG	AG	AG	GG	GG	AA	GG	AA	GG	GG	AA	GG
26	chrD1.77668603	50518778	chrD1	0.315789	0.443812	19	22	0.863636	AA	AA	AA	CC	CC	AA	AA	AA	AC	AC	NA	AC	AC	AA	AA	NA	AA	CC	AA	AA	CC	NA
27	chrD1.77679439	50526145	chrD1	0.285714	0.418118	21	22	0.954545	GG	GG	GG	AA	AA	GG	GG	GG	AG	AG	GG	NA	AG	GG	GG	AG	GG	AA	GG	GG	AA	GG
28	chrD1.77713705	50559782	chrD1	0.47619	0.511034	21	22	0.954545	GG	AG	GG	AG	AG	AG	AA	AG	GG	NA	AA	AG	GG	AA	AA	AG	AG	GG	AG	AG	GG	AA
29	chrD1.77727285	50573366	chrD1	0.447368	0.507824	19	22	0.863636	AA	AG	AA	AA	AA	AG	GG	AG	AA	NA	GG	AG	NA	GG	GG	AA	AG	AA	AG	AG	NA	GG
30	chrD1.77733537	50579583	chrD1	0.25	0.384615	20	22	0.909091	AA	AA	AA	GG	GG	AA	AA	AA	AA	NA	AA	AG	AG	AA	AA	NA	AA	GG	AA	AA	GG	AA
31	chrD1.77783650	50602582	chrD1	0.157895	0.273115	19	22	0.863636	AA	AA	AA	AG	AG	AA	AA	AA	AG	AA	AA	AG	NA	AA	AA	NA	AA	GG	AA	AA	NA	AA
32	chrD1.77796818	50615939	chrD1	0.475	0.511538	20	22	0.909091	GG	CG	GG	GG	GG	CG	CC	CG	GG	CG	CC	CG	GG	CC	CC	NA	CG	NA	CG	CC	GG	CC
33	chrD1.77814590	50629701	chrD1	0.184211	0.308677	19	22	0.863636	CC	CC	CC	AC	AC	CC	CC	CC	AA	CC	CC	AC	NA	CC	CC	NA	CC	AA	CC	CC	NA	CC
34	chrD1.77858353	50663888	chrD1	0.227273	0.359408	22	22	1	GG	AG	AG	AA	AA	AG	AA	AG	AA	AA	AA	AA	GG	AA	AA	AA	AG	AA	AG	AA	AA	AA
35	chrD1.77867260	50669772	chrD1	0.473684	0.512091	19	22	0.863636	GG	AG	GG	AG	AG	AG	AG	AG	GG	AA	NA	AG	GG	AA	AG	NA	AG	GG	AG	AA	NA	AA
36	chrD1.77886148	50688560	chrD1	0.35	0.466667	20	22	0.909091	TT	AT	TT	TT	TT	AT	AT	AT	TT	AT	NA	AT	TT	AA	AT	AT	AT	TT	AT	AA	TT	NA
37	chrD1.77894167	50696578	chrD1	0.204545	0.332981	22	22	1	GG	AG	AG	AA	AA	AG	AA	AG	AA	AA	AA	AA	AG	AA	AA	AA	AG	AA	AG	AA	AA	AA
38	chrD1.77914971	50708849	chrD1	0.227273	0.359408	22	22	1	TT	AT	AT	AA	AA	AT	AA	AT	AA	AA	AA	AA	AT	AA	AA	AA	AT	AA	AT	AT	AA	AA
39	chrD1.77921393	50713956	chrD1	0.227273	0.359408	22	22	1	AA	AT	AT	TT	TT	AT	TT	AT	TT	TT	TT	TT	AT	TT	TT	TT	AT	TT	AT	AT	TT	TT
40	chrD1.77940104	50727199	chrD1	0.227273	0.359408	22	22	1	CC	AC	AC	AA	AA	AC	AA	AC	AA	AA	AA	AA	AC	AA	AA	AA	AC	AA	AC	AC	AA	AA
41	chrD1.77969157	50753949	chrD1	0.35	0.466667	20	22	0.909091	GG	AG	GG	GG	GG	AG	AG	AG	GG	NA	AG	AG	GG	AA	AG	GG	AG	GG	AG	AG	NA	AA
42	chrD1.77996541	50775826	chrD1	0.325	0.45	20	22	0.909091	GG	AG	GG	GG	GG	AG	NA	AG	GG	AG	NA	AG	GG	AA	AG	GG	AG	GG	AG	AG	GG	AA
43	chrD1.78016076	50789965	chrD1	0.425	0.501282	20	22	0.909091	AA	AA	AA	GG	AG	AG	AG	AG	AA	NA	AG	AG	AA	GG	AG	AG	AG	NA	AG	AG	AA	GG
44	chrD1.78077716	50837045	chrD1	0.25	0.384615	20	22	0.909091	TT	TT	TT	TT	TT	AT	AT	AT	TT	NA	TT	NA	TT	AT	AT	TT	AT	TT	AT	AT	TT	AA
45	chrD1.78105646	50864835	chrD1	0.272727	0.40592	22	22	1	GG	GG	GG	GG	GG	AG	AG	AG	GG	AG	GG	AG	GG	AG	AG	GG	AG	GG	AG	AG	GG	AA
46	chrD1.78110149	50867601	chrD1	0.325	0.45	20	22	0.909091	AA	AA	AA	AA	AA	AG	AG	AG	AA	NA	AG	AG	AA	GG	AG	NA	AG	AA	AG	AG	AA	GG
47	chrD1.78116127	50873730	chrD1	0.404762	0.493612	21	22	0.954545	AA	AA	AG	GG	GG	AA	AG	AA	GG	AG	AG	AG	NA	AA	AG	AG	AA	GG	AA	AA	GG	AA
48	chrD1.78138138	50892018	chrD1	0.194444	0.322222	18	22	0.818182	GG	GG	NA	AA	AA	AG	AA	AG	AA	AA	AA	AA	AA	AA	AA	AA	NA	AA	NA	AG	NA	AA
49	chrD1.78195663	50945233	chrD1	0.25	0.383721	22	22	1	CC	CC	CG	GG	GG	CG	GG	CG	GG	GG	GG	GG	CG	GG	GG	GG	CG	GG	CG	CG	GG	GG
50	chrD1.78202375	50951782	chrD1	0.340909	0.459831	22	22	1	AA	AA	AA	AA	AA	AT	AT	AT	AA	AT	AT	AT	AA	AT	AT	TT	AT	AA	AT	AT	AA	TT
51	chrD1.78206761	50955515	chrD1	0.4	0.492308	20	22	0.909091	AA	AA	AA	AG	AG	AG	AG	AG	AA	NA	AG	AG	AA	GG	AG	AG	AG	AA	AG	AG	NA	GG
52	chrD1.78211439	50959691	chrD1	0.25	0.383721	22	22	1	GG	GG	AG	AA	AA	AG	AA	AG	AA	AA	AA	AA	AG	AA	AA	AA	AG	AA	AG	AG	AA	AA
53	chrD1.78228750	50970485	chrD1	0.309524	0.437863	21	22	0.954545	GG	GG	GG	GG	GG	AG	NA	AG	GG	GG	AG	AG	GG	AG	AG	AA	AG	GG	AG	AG	GG	AA
54	chrD1.78236075	50976890	chrD1	0.25	0.383721	22	22	1	AA	AA	AG	GG	GG	AG	GG	AG	GG	GG	GG	GG	AG	GG	GG	GG	AG	GG	AG	AG	GG	GG
55	chrD1.78245997	50985540	chrD1	0.3	0.430769	20	22	0.909091	AA	AA	AA	AA	AA	AG	AG	AG	AA	AG	NA	AG	AA	AG	AG	NA	AG	AA	AG	AG	AA	GG
56	chrD1.78253904	50993698	chrD1	0.25	0.383721	22	22	1	AA	AA	AG	GG	GG	AG	GG	AG	GG	GG	GG	GG	AG	GG	GG	GG	AG	GG	AG	AG	GG	GG
57	chrD1.78260348	51000141	chrD1	0.25	0.383721	22	22	1	GG	GG	AG	AA	AA	AG	AA	AG	AA	AA	AA	AA	AG	AA	AA	AA	AG	AA	AG	AG	AA	AA
58	chrD1.78271945	51004323	chrD1	0.25	0.384615	20	22	0.909091	GG	GG	GG	GG	GG	AG	AG	AG	GG	AG	NA	AG	GG	AG	AG	GG	AG	GG	AG	AG	GG	NA
59	chrD1.78285887	51015517	chrD1	0.386364	0.485201	22	22	1	TT	TT	AT	AA	AA	TT	AA	AT	AA	AT	AA	AT	AT	TT	AA	AA	AT	AA	AT	AT	AA	AT
60	chrD1.78290228	51019860	chrD1	0.452381	0.507549	21	22	0.954545	AA	AA	AC	CC	CC	AA	CC	AC	AC	AC	NA	AC	AC	AA	CC	CC	AC	CC	AC	AC	AC	AC
61	chrD1.78294953	51023475	chrD1	0.5	0.511628	22	22	1	AA	AA	AT	TT	TT	AA	TT	AT	AT	AA	AA	AT	AT	AA	TT	AT	AT	TT	AT	AT	TT	AT
62	chrD1.78299358	51027879	chrD1	0.47619	0.511034	21	22	0.954545	CC	CC	AC	AA	AA	CC	AA	AC	AC	AC	NA	AC	AC	CC	AA	AA	AC	AA	AC	AC	CC	AC
63	chrD1.78308322	51035333	chrD1	0.113636	0.206131	22	22	1	AA	AA	AA	AG	AG	AA	AA	AA	AA	GG	AA	AA	AA	AA	AA	AA	AA	AG	AA	AA	AA	AA
64	chrD1.78387694	51111653	chrD1	0.375	0.480769	20	22	0.909091	CC	CC	AC	AC	AC	AC	AA	AC	AC	NA	CC	AA	AC	AC	AA	AA	AA	AA	AA	AC	NA	AA
65	chrD1.78392470	51116161	chrD1	0.236842	0.371266	19	22	0.863636	GG	GG	AG	AA	AA	AG	AA	AG	AG	AA	NA	AA	NA	AA	AA	AA	AA	AA	AA	AG	NA	AA
66	chrD1.78401168	51123102	chrD1	0.375	0.480769	20	22	0.909091	GG	GG	AG	AG	AG	AG	AA	AG	AG	NA	AG	AA	AG	AG	AA	AA	AA	AA	AA	AG	NA	AG
67	chrD1.78410738	51131208	chrD1	0.35	0.466667	20	22	0.909091	GG	GG	AG	AG	AG	AG	AA	AG	NA	GG	AA	AA	AG	AA	AA	AA	AA	AA	AA	AG	NA	AG
68	chrD1.78440604	51153272	chrD1	0.5	0.512195	21	22	0.954545	AA	AA	AA	AG	AG	AA	GG	AG	AG	AA	AG	AG	NA	AG	AG	GG	AG	GG	AG	GG	GG	AG
69	chrD1.78445113	51157783	chrD1	0.475	0.511538	20	22	0.909091	GG	GG	NA	AG	AG	GG	AA	AG	AG	GG	AG	AG	AG	AG	AG	AA	AG	AA	AG	AA	AA	NA
70	chrD1.78463979	51177183	chrD1	0.447368	0.507824	19	22	0.863636	AA	AA	AA	AC	CC	AA	CC	AC	AC	AC	NA	AC	AA	AA	AA	CC	AC	NA	AC	CC	CC	NA
1	chrD2.80119209	59655061	chrD2	0.113636	0.206131	22	22	1	GG	GG	AA	GG	GG	AG	GG	AG	GG	GG	GG	GG	GG	GG	GG	GG	GG	AG	GG	GG	GG	GG
2	chrD2.80120708	59656489	chrD2	0.431818	0.502114	22	22	1	CC	CC	CC	AC	CC	CC	AC	AC	AC	AA	AC	AC	AC	AC	CC	AA	AC	AC	AA	CC	AC	AA
3	chrD2.80123404	59659185	chrD2	0.214286	0.344948	21	22	0.954545	CC	CC	CC	AC	CC	CC	AC	CC	CC	AC	CC	AC	CC	CC	CC	CC	AC	AC	AA	CC	NA	AC
4	chrD2.80125644	59661422	chrD2	0.5	0.513514	19	22	0.863636	AA	AA	GG	GG	AA	AG	AG	GG	AG	NA	AA	AG	AA	GG	AA	NA	AG	GG	GG	AA	GG	NA
5	chrD2.80130980	59666758	chrD2	0.159091	0.273784	22	22	1	CC	CC	AA	CC	CC	AC	CC	AC	CC	CC	CC	CC	CC	AC	CC	CC	CC	AC	CC	CC	CC	AC
6	chrD2.80133542	59669321	chrD2	0.142857	0.250871	21	22	0.954545	GG	GG	GG	GG	GG	GG	GG	AG	AG	AG	GG	GG	GG	AG	GG	AA	GG	GG	GG	GG	NA	GG
7	chrD2.80134543	59670322	chrD2	0.136364	0.241015	22	22	1	GG	GG	GG	GG	GG	GG	GG	AG	AG	AG	GG	GG	GG	AG	GG	AG	GG	GG	GG	GG	AG	GG
8	chrD2.80135970	59671749	chrD2	0.428571	0.501742	21	22	0.954545	AA	AA	AA	GG	AA	AA	AG	AG	AG	GG	AA	AG	AG	AG	AA	GG	AG	AG	GG	AA	GG	NA
9	chrD2.80140094	59675873	chrD2	0.35	0.466667	20	22	0.909091	GG	GG	AG	AG	GG	AG	NA	AG	GG	AA	GG	AG	GG	AG	GG	GG	AG	AA	AA	GG	NA	AG
10	chrD2.80143149	59678926	chrD2	0.452381	0.507549	21	22	0.954545	AA	AA	GG	GG	AA	AG	AG	GG	AG	GG	AA	AG	AG	GG	AA	GG	AG	GG	GG	AA	NA	AG
11	chrD2.80143714	59679491	chrD2	0.404762	0.493612	21	22	0.954545	AA	AA	CC	CC	AA	AC	AC	AC	AA	AC	AA	AC	NA	AC	AA	AA	AC	CC	CC	AA	AC	AC
12	chrD2.80145686	59681463	chrD2	0.477273	0.510571	22	22	1	AA	AA	GG	AG	AA	AG	AG	GG	AG	GG	AA	AG	AA	GG	AA	GG	AG	GG	GG	AA	GG	AG
13	chrD2.80148171	59683948	chrD2	0.309524	0.437863	21	22	0.954545	AG	AA	GG	GG	AA	AG	AG	GG	AG	GG	AG	AG	GG	GG	AG	GG	AG	GG	GG	AG	NA	GG
14	chrD2.80157255	59685085	chrD2	0.35	0.466667	20	22	0.909091	AG	GG	AA	AA	GG	AG	AG	AA	AG	NA	GG	AG	AA	AA	AG	AA	AG	AA	AA	AG	NA	AA
15	chrD2.80158595	59686425	chrD2	0.340909	0.459831	22	22	1	AG	AA	GG	GG	AA	AG	AG	GG	AG	GG	AA	AG	GG	GG	AG	GG	AG	GG	GG	AG	GG	AG
16	chrD2.80162379	59690208	chrD2	0.236842	0.371266	19	22	0.863636	AA	AA	AA	CC	AA	AA	AC	AA	AA	NA	AA	AC	AC	AA	AA	AA	AC	NA	CC	AA	NA	AC
17	chrD2.80164543	59692372	chrD2	0.380952	0.483159	21	22	0.954545	AG	AA	GG	AA	AA	AG	AA	GG	AG	AA	AA	AA	AG	GG	NA	GG	AA	AG	AA	AG	GG	AA
18	chrD2.80165097	59692926	chrD2	0.363636	0.473573	22	22	1	AG	AA	GG	AG	AA	AG	AG	GG	AG	GG	AA	AG	AG	GG	AG	GG	AG	GG	GG	AG	GG	GG
19	chrD2.80166376	59694095	chrD2	0.409091	0.494715	22	22	1	AG	AA	GG	AG	AA	AG	AG	GG	AG	GG	AA	AG	AA	GG	AG	GG	AG	GG	GG	AG	GG	AG
20	chrD2.80167615	59695334	chrD2	0.421053	0.500711	19	22	0.863636	AG	GG	GG	AG	GG	GG	AG	AG	AG	AG	GG	AG	NA	AG	AG	AA	AG	AG	AA	AG	NA	NA
21	chrD2.80171162	59698880	chrD2	0.125	0.224359	20	22	0.909091	CC	CC	AA	CC	CC	AC	CC	NA	CC	CC	CC	CC	CC	AC	CC	NA	CC	CC	CC	CC	AC	CC
22	chrD2.80179478	59705540	chrD2	0.357143	0.470383	21	22	0.954545	AG	GG	AA	AA	GG	AG	AG	AA	AG	AA	GG	AG	AA	AA	AG	AA	AG	AA	AA	AG	NA	AG
23	chrD2.80182305	59708365	chrD2	0.363636	0.473573	22	22	1	AG	GG	AA	AA	GG	AG	AG	AA	AG	AG	GG	AG	AA	AA	AG	AA	AG	AA	AA	AG	AA	AG
24	chrD2.80183190	59709250	chrD2	0.305556	0.436508	18	22	0.818182	AG	AA	GG	GG	AA	AG	NA	GG	AG	GG	NA	GG	GG	GG	AG	NA	AG	GG	GG	AG	NA	AG
25	chrD2.80193250	59717730	chrD2	0.309524	0.437863	21	22	0.954545	AG	GG	GG	AG	GG	GG	AG	GG	GG	NA	GG	AG	AG	GG	AG	GG	AG	AG	AA	AG	AG	AG
26	chrD2.80196936	59721406	chrD2	0.47619	0.511034	21	22	0.954545	AG	GG	GG	AA	GG	GG	AG	NA	AG	AA	GG	AG	AA	AG	AG	AA	AG	AG	AA	AG	AA	AG
27	chrD2.80199507	59722425	chrD2	0.404762	0.493612	21	22	0.954545	AG	AA	GG	AG	AA	AG	AG	GG	AG	GG	AA	AG	GG	GG	AG	NA	AG	GG	GG	AG	AG	AG
28	chrD2.80200626	59723544	chrD2	0.363636	0.473573	22	22	1	AA	AA	CC	AC	AA	AC	AA	CC	AC	AC	AA	AA	AC	CC	AA	CC	AA	AC	AA	AA	CC	AA
29	chrD2.80214785	59737902	chrD2	0.472222	0.512698	18	22	0.818182	AG	AA	NA	AG	AA	AA	NA	AG	NA	GG	AA	AG	AG	AG	AG	GG	AG	NA	GG	AG	AG	AG
30	chrD2.80215327	59738444	chrD2	0.4	0.492308	20	22	0.909091	AG	GG	AA	AG	GG	AG	AG	AA	NA	AA	GG	AG	AG	AA	AG	NA	AG	AA	AA	AG	AA	AG
31	chrD2.80218405	59740013	chrD2	0.3	0.430769	20	22	0.909091	AG	GG	GG	AG	GG	GG	AG	GG	GG	GG	GG	AG	AG	GG	AG	GG	AG	AA	AA	AG	NA	NA
32	chrD2.80222029	59743557	chrD2	0.357143	0.470383	21	22	0.954545	CG	GG	GG	CC	GG	GG	CG	GG	GG	CG	GG	CG	CC	GG	CG	GG	CG	CG	CC	CG	NA	CG
33	chrD2.80225464	59746992	chrD2	0.181818	0.30444	22	22	1	CC	CC	CC	CC	CC	CC	CC	AC	AC	AC	CC	CC	CC	AC	CC	AA	CC	CC	CC	CC	AA	CC
34	chrD2.80230259	59751785	chrD2	0.142857	0.250871	21	22	0.954545	TT	TT	TT	TT	TT	TT	TT	AT	AT	AT	TT	TT	TT	AT	TT	AA	TT	TT	TT	TT	NA	TT
35	chrD2.80259567	59762322	chrD2	0.35	0.466667	20	22	0.909091	AC	AA	AA	AC	AA	AA	AC	AA	AA	AC	AA	AC	CC	AC	AC	AA	AC	AC	CC	AC	NA	NA
36	chrD2.80264038	59766688	chrD2	0.5	0.511628	22	22	1	AC	AA	CC	CC	AA	AC	AC	AC	AA	AC	AA	AC	CC	CC	AC	AA	AC	CC	CC	AC	AA	AC
37	chrD2.80271872	59772495	chrD2	0.340909	0.459831	22	22	1	AG	GG	GG	AG	GG	GG	AG	GG	GG	AG	GG	AG	AG	AG	AG	GG	AG	AG	AA	AG	AG	AG
38	chrD2.80277466	59778449	chrD2	0.275	0.408974	20	22	0.909091	AG	GG	GG	AG	GG	GG	AG	GG	GG	NA	GG	AG	AG	AG	AG	GG	AG	AG	NA	AG	GG	AG
39	chrD2.80282864	59783846	chrD2	0.409091	0.494715	22	22	1	AG	GG	AA	AG	GG	AG	AG	AA	AG	AA	GG	AG	AG	AA	AG	AG	AG	AA	AA	AG	AG	AA
40	chrD2.80300950	59797576	chrD2	0.142857	0.250871	21	22	0.954545	CC	CC	CC	AC	CC	CC	CC	AC	AC	AC	CC	CC	AC	CC	CC	NA	CC	CC	CC	CC	AC	CC
41	chrD2.80307299	59803923	chrD2	0.142857	0.250871	21	22	0.954545	AA	AA	GG	AA	AA	AG	AA	AG	AA	AA	AA	AA	AA	AG	AA	AA	AA	AG	AA	AA	NA	AA
42	chrD2.80314508	59806347	chrD2	0.136364	0.241015	22	22	1	AA	AA	CC	AA	AA	AC	AA	AC	AA	AA	AA	AA	AA	AC	AA	AA	AA	AC	AA	AA	AA	AA
43	chrD2.80331854	59822039	chrD2	0.295455	0.426004	22	22	1	AG	GG	AA	AA	GG	AG	AG	AA	AG	AA	AG	AA	AA	AA	AG	AA	AG	AA	AA	AG	AA	AG
44	chrD2.80347072	59837664	chrD2	0.190476	0.315912	21	22	0.954545	GG	GG	GG	GG	GG	GG	GG	AG	AG	AG	NA	AG	GG	GG	GG	AA	GG	GG	GG	GG	AA	GG
45	chrD2.80378634	59869231	chrD2	0.214286	0.344948	21	22	0.954545	AC	CC	CC	AC	CC	CC	CC	CC	CC	AC	CC	AC	AC	AC	AC	CC	CC	CC	CC	AC	NA	AC
46	chrD2.80398195	59884575	chrD2	0.190476	0.315912	21	22	0.954545	AG	GG	GG	AG	GG	GG	GG	AG	AG	AG	AG	AG	AG	GG	GG	NA	GG	GG	GG	GG	GG	GG
47	chrD2.80404540	59891342	chrD2	0.47619	0.511034	21	22	0.954545	GG	AA	AA	GG	AA	AG	AA	AG	AG	GG	AG	GG	GG	AG	AG	GG	AA	AA	AA	AG	NA	AG
48	chrD2.80424098	59912493	chrD2	0.428571	0.501742	21	22	0.954545	AA	CC	CC	AC	CC	AC	CC	AC	AC	NA	AC	AA	AC	AC	AC	AA	CC	CC	CC	AC	AA	AC
49	chrD2.80472496	59953772	chrD2	0.380952	0.483159	21	22	0.954545	GG	AA	AA	AG	AA	AG	AA	AG	AG	NA	AA	AG	AG	AG	AG	GG	AA	AA	AA	AG	GG	AG
50	chrD2.80490536	59967929	chrD2	0.421053	0.500711	19	22	0.863636	AA	CC	CC	AA	CC	AC	CC	AC	AC	NA	NA	AA	AA	AC	AC	NA	CC	CC	CC	AC	AC	AC
51	chrD2.80497719	59975112	chrD2	0.272727	0.40592	22	22	1	AA	GG	GG	AA	GG	AG	GG	GG	GG	GG	GG	AG	AA	AG	AG	GG	GG	GG	GG	AG	GG	AG
52	chrD2.80539419	60014982	chrD2	0.113636	0.206131	22	22	1	CG	CC	CC	CC	CC	CG	CC	CC	CC	CC	CG	CG	CC	CC	CC	CC	CC	CC	CC	CC	CG	CC
53	chrD2.80588105	60057067	chrD2	0.204545	0.332981	22	22	1	AC	AA	AA	AA	AA	AC	AA	AC	AC	AC	AA	AA	AA	AA	AA	CC	AA	AA	AA	AA	CC	AA
54	chrD2.80627574	60087845	chrD2	0.175	0.296154	20	22	0.909091	AG	AA	AA	AA	AA	AA	AA	AG	NA	AG	AG	AG	AA	AA	AA	NA	AA	AA	AA	AA	GG	AA
55	chrD2.80632512	60092784	chrD2	0.113636	0.206131	22	22	1	AG	GG	GG	GG	GG	AG	GG	GG	GG	GG	AG	AG	GG	GG	GG	GG	GG	GG	GG	GG	AG	GG
56	chrD2.80639417	60099689	chrD2	0.214286	0.344948	21	22	0.954545	AC	CC	CC	CC	CC	AC	CC	AC	AC	AC	AC	AC	CC	CC	CC	AA	CC	CC	CC	CC	NA	CC
57	chrD2.80664363	60118148	chrD2	0.142857	0.250871	21	22	0.954545	GG	GG	GG	GG	GG	GG	GG	AG	NA	AG	AG	AG	GG	GG	GG	AA	GG	GG	GG	GG	GG	GG
58	chrD2.80678425	60129706	chrD2	0.5	0.511628	22	22	1	AA	GG	GG	AA	GG	AG	GG	AG	AG	AA	AG	AA	AA	AG	AG	AA	GG	GG	GG	AG	AA	AG
59	chrD2.80723297	60167517	chrD2	0.157895	0.273115	19	22	0.863636	GG	GG	GG	GG	GG	AG	GG	AG	AG	AG	NA	AG	NA	AG	GG	GG	GG	GG	GG	GG	NA	GG
60	chrD2.80739839	60174983	chrD2	0.210526	0.341394	19	22	0.863636	AA	AA	AA	AA	AA	AG	AA	AG	NA	AG	AG	AG	NA	AG	AA	NA	AA	AA	AA	AA	GG	AA
61	chrD2.80743217	60178358	chrD2	0.131579	0.234708	19	22	0.863636	CC	CC	CC	CC	CC	AC	CC	AC	NA	NA	CC	CC	NA	AC	CC	AC	CC	CC	CC	CC	AC	CC
62	chrD2.80762831	60199658	chrD2	0.272727	0.40592	22	22	1	AG	AA	AA	GG	AA	AA	AA	AA	AA	AG	AA	AG	AG	AG	AG	AA	AA	AA	AA	AG	GG	AG
63	chrD2.80786465	60213551	chrD2	0.333333	0.455285	21	22	0.954545	AA	AA	GG	AA	GG	GG	GG	AG	AG	AA	AA	AA	AA	AA	AA	AA	GG	NA	AG	AA	AG	AA
64	chrD2.80800515	60222158	chrD2	0.204545	0.332981	22	22	1	AA	AG	AA	AA	AA	AA	AA	AA	AA	AA	AG	AA	AA	AG	AG	GG	AA	AA	AG	AG	AA	AG
65	chrD2.80804331	60226338	chrD2	0.363636	0.473573	22	22	1	AA	AA	CC	AA	CC	CC	CC	AC	AC	AA	AA	AA	AA	AA	AA	AA	CC	CC	AC	AA	AC	AA
66	chrD2.80808156	60230164	chrD2	0.159091	0.273784	22	22	1	AG	GG	GG	AG	GG	GG	GG	GG	GG	AG	AG	AA	GG	GG	GG	GG	GG	GG	GG	GG	GG	AG
67	chrD2.80821431	60243117	chrD2	0.425	0.501282	20	22	0.909091	AG	GG	GG	AG	AA	AG	AA	AG	NA	AG	NA	AA	GG	GG	GG	GG	AA	AA	AG	GG	GG	AG
68	chrD2.80871296	60278766	chrD2	0.204545	0.332981	22	22	1	AC	AC	CC	CC	CC	AC	CC	CC	AC	CC	AC	AC	AA	AC	CC	CC	CC	CC	CC	CC	CC	CC
69	chrD2.80877974	60283564	chrD2	0.25	0.384615	20	22	0.909091	AG	AG	GG	AG	GG	AG	GG	GG	GG	AG	AA	AA	NA	GG	GG	NA	GG	GG	GG	GG	GG	AG
70	chrD2.80904532	60305345	chrD2	0.357143	0.470383	21	22	0.954545	AC	AC	AC	CC	CC	CC	AC	CC	AC	CC	CC	CC	AC	AA	AC	NA	AC	CC	AA	CC	AA	AC
71	chrD2.80908775	60309588	chrD2	0.190476	0.315912	21	22	0.954545	AG	AG	AG	GG	GG	AG	GG	GG	GG	GG	AA	AG	GG	GG	GG	NA	GG	GG	GG	AG	GG	GG
72	chrD2.80926046	60326676	chrD2	0.475	0.511538	20	22	0.909091	AG	AG	GG	AA	AA	AG	AG	AA	AA	AA	GG	AG	NA	AG	AG	GG	AG	AG	GG	AG	NA	AG
73	chrD2.80943573	60338083	chrD2	0.142857	0.250871	21	22	0.954545	AG	AG	AA	AA	AA	AA	AA	AA	AG	AA	AA	AA	AG	AG	AA	AG	AA	AA	AA	AA	AA	NA
74	chrD2.80948971	60343480	chrD2	0.190476	0.315912	21	22	0.954545	AG	AG	AA	AA	AA	AA	NA	AA	AG	AA	AA	AA	GG	AG	AA	AG	AA	AA	AA	AG	AA	AA
75	chrD2.80952511	60346540	chrD2	0.261905	0.396051	21	22	0.954545	AA	AA	AG	AA	AA	AA	AG	AA	AA	AA	AA	AA	AA	AG	AG	AG	AG	AG	GG	AG	AG	NA
76	chrD2.80959028	60355192	chrD2	0.325	0.45	20	22	0.909091	AA	AA	AG	AA	AA	AA	AG	AA	AA	NA	AA	AA	NA	AG	AG	GG	AG	AG	GG	AA	GG	AG
77	chrD2.80966049	60360885	chrD2	0.275	0.408974	20	22	0.909091	AG	AG	AA	NA	AA	AG	AA	AA	AA	AG	GG	GG	AA	AA	AG	AA	AA	AA	AA	AA	NA	GG
78	chrD2.81015522	60402148	chrD2	0.425	0.501282	20	22	0.909091	AA	AG	AG	AG	GG	AG	GG	GG	GG	AG	AA	AA	AG	GG	AG	NA	GG	GG	NA	AA	GG	AA
79	chrD2.81032432	60411196	chrD2	0.477273	0.510571	22	22	1	GG	GG	AG	AA	AA	AG	AG	AA	AG	AG	AG	AG	AA	AG	AG	GG	GG	AG	GG	AG	AG	AG
80	chrD2.81036607	60415366	chrD2	0.210526	0.341394	19	22	0.863636	AA	AG	GG	NA	GG	AG	GG	GG	GG	GG	NA	AG	GG	GG	GG	AA	GG	GG	GG	AG	GG	NA
81	chrD2.81058710	60431640	chrD2	0.190476	0.315912	21	22	0.954545	AA	AG	GG	GG	GG	GG	GG	GG	GG	GG	NA	GG	GG	GG	AG	AA	GG	GG	GG	AG	GG	AG
82	chrD2.81064769	60437553	chrD2	0.261905	0.396051	21	22	0.954545	AA	AA	AG	AG	GG	AG	AA	AA	AA	AA	AG	GG	AG	AA	AG	AA	AA	AA	AA	AA	NA	AG
83	chrD2.81073337	60446119	chrD2	0.210526	0.341394	19	22	0.863636	GG	GG	NA	AG	AA	AG	GG	GG	GG	GG	AG	AA	AG	GG	NA	GG	GG	GG	GG	GG	GG	NA
84	chrD2.81077480	60450261	chrD2	0.25	0.384615	20	22	0.909091	GG	GG	AG	AG	AA	AG	GG	GG	GG	AG	AG	AA	NA	GG	NA	GG	GG	GG	GG	GG	GG	AG
85	chrD2.81081922	60454703	chrD2	0.275	0.408974	20	22	0.909091	GG	AG	AG	GG	GG	GG	AG	GG	NA	GG	GG	GG	GG	NA	GG	AG	AA	AG	AA	GG	AA	GG
86	chrD2.81105387	60470312	chrD2	0.275	0.408974	20	22	0.909091	GG	GG	AG	GG	GG	GG	AG	GG	AG	NA	GG	GG	GG	AG	GG	NA	AA	AG	AA	GG	AA	GG
1	chrD4.37213961	45514026	chrD4	0.454545	0.5074	22	22	1	AA	AA	AG	AG	GG	GG	AA	GG	GG	GG	AA	AG	AA	GG	AG	AG	GG	GG	GG	AG	AA	AA
2	chrD4.37217107	45517165	chrD4	0.416667	0.5	18	22	0.818182	GG	GG	AG	AG	GG	AG	GG	AA	AA	GG	NA	AA	AG	GG	AG	NA	GG	NA	AG	AG	NA	AA
3	chrD4.37218197	45518260	chrD4	0.166667	0.285714	18	22	0.818182	AA	AA	AA	AA	GG	NA	AA	AA	AA	GG	AA	AA	AA	NA	AA	AA	GG	AA	NA	NA	AA	AA
4	chrD4.37219328	45519393	chrD4	0.111111	0.203175	18	22	0.818182	CC	CC	NA	NA	GG	GG	NA	GG	GG	GG	GG	GG	GG	GG	NA	GG	GG	GG	GG	GG	GG	GG
5	chrD4.37223722	45523787	chrD4	0.210526	0.341394	19	22	0.863636	AA	AA	NA	GG	GG	GG	AG	GG	GG	GG	NA	GG	NA	GG	AG	AG	GG	AG	GG	GG	GG	GG
6	chrD4.37224749	45524814	chrD4	0.25	0.384615	20	22	0.909091	GG	GG	AG	NA	AA	AA	AG	AA	AA	AA	AG	AA	AG	AA	AG	AA	AA	AG	AA	AA	NA	AA
7	chrD4.37235614	45530440	chrD4	0.45	0.507692	20	22	0.909091	AA	AA	GG	AA	GG	AG	AG	AA	AA	GG	AG	AG	NA	GG	AA	GG	GG	AG	AG	GG	NA	GG
8	chrD4.37236712	45531539	chrD4	0.236842	0.371266	19	22	0.863636	GG	GG	GG	NA	GG	AG	GG	AA	AA	GG	GG	AG	GG	NA	AG	GG	GG	AG	NA	GG	AG	GG
9	chrD4.37242967	45536525	chrD4	0.4	0.492308	20	22	0.909091	AA	AA	AA	NA	GG	GG	AA	GG	GG	GG	AA	AG	AA	GG	AG	AG	GG	GG	GG	AG	GG	NA
10	chrD4.37244215	45537773	chrD4	0.261905	0.396051	21	22	0.954545	AA	AA	AA	AA	GG	AG	AA	AA	AA	GG	AA	AA	AA	AG	AA	AG	GG	NA	AG	AG	AA	AA
11	chrD4.37250229	45541818	chrD4	0.472222	0.512698	18	22	0.818182	GG	GG	AA	NA	AA	AG	AG	GG	GG	NA	AG	AG	NA	AA	GG	AA	AA	GG	AG	AA	NA	AA
12	chrD4.37251192	45542781	chrD4	0.113636	0.206131	22	22	1	GG	GG	AG	GG	GG	GG	AG	GG	GG	GG	GG	GG	GG	AG	GG	AG	GG	AG	GG	GG	GG	GG
13	chrD4.37253996	45544995	chrD4	0.225	0.357692	20	22	0.909091	AA	AA	AA	AC	AA	AC	AA	CC	CC	AA	AA	AC	AA	AA	AC	AA	AA	NA	AC	AA	NA	AA
14	chrD4.37249132	45547354	chrD4	0.227273	0.359408	22	22	1	GG	GG	GG	GG	AA	AG	GG	GG	GG	AA	GG	GG	GG	AG	GG	GG	AA	GG	AG	AG	GG	GG
15	chrD4.37265198	45557849	chrD4	0.5	0.511628	22	22	1	GG	GG	AG	GG	AA	AG	AG	GG	GG	AG	AG	AG	AG	AA	GG	AA	AA	AG	AG	AA	AG	AA
16	chrD4.37267695	45560346	chrD4	0.113636	0.206131	22	22	1	AA	AA	AA	AA	AG	AA	AA	AA	AA	AG	AA	AA	AA	AG	AA	AA	AG	AA	AA	AG	AA	AA
17	chrD4.37268557	45561208	chrD4	0.454545	0.5074	22	22	1	AA	AA	AA	AG	GG	GG	AA	GG	GG	GG	AA	AG	AA	GG	AG	AG	GG	GG	GG	AG	AG	AA
18	chrD4.37276550	45563773	chrD4	0.25	0.383721	22	22	1	AA	AA	AA	AT	AA	AT	AA	TT	TT	AA	AA	AT	AA	AA	AT	AA	AA	AT	AT	AA	AT	AA
19	chrD4.37282382	45569818	chrD4	0.142857	0.250871	21	22	0.954545	CC	CC	CC	AC	CC	CC	CC	AC	AC	NA	CC	AC	CC	CC	CC	CC	AC	CC	CC	AC	CC	CC
20	chrD4.37285610	45572853	chrD4	0.181818	0.30444	22	22	1	CC	CC	AC	CC	CC	CC	CC	CC	CC	CC	CC	CC	CC	AC	AC	AA	CC	AA	AC	CC	CC	CC
21	chrD4.37287829	45575051	chrD4	0.181818	0.30444	22	22	1	GG	GG	GG	AG	GG	GG	GG	AG	AG	GG	GG	AG	GG	GG	GG	GG	AG	GG	GG	AG	AA	GG
22	chrD4.37292389	45580089	chrD4	0.25	0.383721	22	22	1	GG	GG	GG	GG	AG	GG	GG	AG	GG	AG	AG	AG	AG	GG	GG	GG	AG	GG	AG	AG	GG	AA
23	chrD4.37294581	45582327	chrD4	0.238095	0.371661	21	22	0.954545	GG	GG	AA	AA	AG	AG	AG	AA	AA	AG	AA	AA	AA	NA	AA	AG	AA	AG	AA	AA	AA	AA
24	chrD4.37297184	45584854	chrD4	0.421053	0.500711	19	22	0.863636	AA	AA	AG	AG	AG	AA	AA	GG	NA	AG	AG	GG	NA	AA	AA	AA	GG	AA	AG	GG	NA	GG
25	chrD4.37313229	45599895	chrD4	0.119048	0.214866	21	22	0.954545	AA	AA	AG	AA	AA	AA	AA	AA	AA	AA	AA	AA	AA	AG	AG	NA	AA	AG	AG	AA	AA	AA
26	chrD4.37333138	45618140	chrD4	0.333333	0.455285	21	22	0.954545	AA	AA	AG	AG	AG	AG	AG	AG	AA	AG	AA	AG	AA	GG	AG	NA	AA	GG	AG	AA	AA	AA
27	chrD4.37338049	45619098	chrD4	0.159091	0.273784	22	22	1	AA	AA	AA	AG	AA	AG	AG	AA	AG	AA	AG	AA	AG	AA	AG	AA	AA	AA	AA	AA	AA	AA
28	chrD4.37353839	45636137	chrD4	0.125	0.224359	20	22	0.909091	TT	TT	TT	NA	TT	AT	AT	TT	AT	TT	AT	TT	TT	TT	AT	TT	TT	TT	TT	TT	NA	TT
29	chrD4.37364928	45642148	chrD4	0.159091	0.273784	22	22	1	AA	AA	AA	AG	AA	AG	AG	AA	AG	AA	AG	AA	AG	AA	AG	AA	AA	AA	AA	AA	AA	AA
30	chrD4.37372052	45648011	chrD4	0.5	0.512195	21	22	0.954545	AA	AG	AG	GG	AA	AG	AG	AA	GG	AG	AG	AG	NA	AG	GG	AG	AG	AG	AG	AG	GG	AA
31	chrD4.37423151	45687420	chrD4	0.272727	0.40592	22	22	1	AC	AC	CC	AC	CC	AC	AC	CC	AA	CC	AC	CC	AC	CC	AC	CC	AC	CC	CC	AC	CC	CC
32	chrD4.37442751	45704846	chrD4	0.238095	0.371661	21	22	0.954545	GG	GG	AA	AG	GG	GG	GG	GG	GG	GG	GG	AG	NA	AG	GG	AG	GG	AG	AG	GG	AA	GG
33	chrD4.37448915	45710807	chrD4	0.204545	0.332981	22	22	1	AG	AG	AA	AA	AG	AG	AG	AG	AA	AG	AA	AA	AA	AG	AG	AA	AA	AA	AA	AA	AA	AA
34	chrD4.37470849	45732918	chrD4	0.425	0.501282	20	22	0.909091	AA	GG	AG	AG	AG	AA	AA	AG	AA	AG	AG	GG	AG	AG	AA	NA	AG	AG	AG	AA	NA	GG
35	chrD4.37503731	45756673	chrD4	0.166667	0.284553	21	22	0.954545	AA	AA	AG	AA	AA	AG	AG	AA	AA	AG	AA	AA	AA	AA	AG	AA	AG	AA	AA	AG	AA	NA
36	chrD4.37511513	45764512	chrD4	0.272727	0.40592	22	22	1	AA	GG	AG	GG	GG	GG	GG	AG	GG	GG	AG	AG	GG	GG	GG	GG	AG	GG	AG	AG	AG	AA
37	chrD4.37521579	45771582	chrD4	0.236842	0.371266	19	22	0.863636	GG	AA	GG	AG	AG	GG	GG	AG	NA	AG	GG	AG	GG	AG	GG	NA	GG	NA	AG	GG	GG	GG
38	chrD4.37525996	45775998	chrD4	0.325	0.45	20	22	0.909091	AA	TT	AA	AT	AT	AA	AA	AT	TT	NA	AA	AT	AA	AT	AA	TT	AA	AT	AT	AA	NA	AA
39	chrD4.37548216	45794994	chrD4	0.194444	0.322222	18	22	0.818182	GG	GG	GG	AA	GG	AG	AG	AG	NA	NA	AG	AG	NA	GG	GG	NA	GG	GG	GG	GG	GG	GG
40	chrD4.37554767	45801682	chrD4	0.454545	0.5074	22	22	1	AC	AA	AC	AC	AA	AC	AC	CC	AC	AC	AC	CC	AC	AA	AC	AA	CC	AA	CC	CC	CC	CC
41	chrD4.37568145	45815059	chrD4	0.275	0.408974	20	22	0.909091	GG	GG	NA	AG	AA	GG	AG	GG	GG	AA	GG	GG	AG	AG	GG	NA	GG	AA	AG	GG	GG	GG
42	chrD4.37580540	45827393	chrD4	0.275	0.408974	20	22	0.909091	AA	GG	AA	AA	GG	AA	AA	AA	AA	GG	AA	AA	AA	AG	AA	GG	AA	GG	NA	AA	NA	AA
43	chrD4.37608501	45843259	chrD4	0.47619	0.511034	21	22	0.954545	GG	AG	AG	AG	AG	AG	NA	AG	AA	AG	GG	AA	GG	AA	AG	GG	AA	AG	AG	AA	AA	GG
44	chrD4.37630841	45865602	chrD4	0.190476	0.315912	21	22	0.954545	AA	AA	AA	AA	AA	GG	AA	AA	AG	NA	AA	AG	AA	GG	AA	AG	AA	AA	AA	AA	AA	AG
45	chrD4.37640815	45868363	chrD4	0.142857	0.250871	21	22	0.954545	GG	GG	GG	GG	GG	AA	GG	GG	AG	GG	GG	AG	GG	AA	GG	GG	GG	GG	GG	GG	GG	NA
46	chrD4.37647681	45875229	chrD4	0.428571	0.501742	21	22	0.954545	GG	AG	NA	GG	AG	AA	AA	AG	AG	AG	GG	AG	GG	AA	AG	AA	GG	GG	GG	GG	AA	AG
47	chrD4.37653476	45881024	chrD4	0.375	0.480769	20	22	0.909091	AA	AG	AG	AA	AG	GG	AG	AG	AG	NA	AA	AG	AA	GG	AG	AG	AA	AG	AA	AA	NA	AG
48	chrD4.37666022	45888290	chrD4	0.35	0.466667	20	22	0.909091	AG	AA	AG	AA	AG	GG	AA	AG	AG	AG	AG	AA	AA	AG	AG	GG	AA	NA	AG	AA	AA	NA
49	chrD4.37673068	45895309	chrD4	0.361111	0.474603	18	22	0.818182	GG	AG	GG	AG	NA	GG	GG	AG	AG	GG	NA	AG	AG	GG	GG	NA	AA	NA	AA	AA	GG	AG
50	chrD4.37697354	45916789	chrD4	0.131579	0.234708	19	22	0.863636	AA	AA	AA	AA	AA	CC	AA	AA	AC	AA	AA	AA	NA	CC	AA	AA	AA	NA	AA	AA	NA	AA
51	chrD4.37701427	45920862	chrD4	0.388889	0.488889	18	22	0.818182	GG	AG	NA	GG	AA	GG	AG	AA	GG	AA	NA	GG	GG	GG	NA	AG	GG	AA	AG	GG	AA	NA
52	chrD4.37759067	45975852	chrD4	0.210526	0.341394	19	22	0.863636	AA	AA	AA	AG	AA	AA	NA	AA	AA	AA	GG	AA	GG	NA	AA	AA	AG	AA	AG	AG	NA	AA
53	chrD4.37839888	46033538	chrD4	0.333333	0.455285	21	22	0.954545	GG	GG	AA	AA	GG	GG	AG	GG	AG	GG	NA	AA	AG	GG	AG	AG	AG	GG	AG	AG	GG	GG
54	chrD4.37845452	46039132	chrD4	0.285714	0.418118	21	22	0.954545	AA	AA	AG	GG	AA	AA	AG	AA	AA	AA	GG	AG	AG	AA	AG	AA	AG	AA	AG	AG	NA	AA
55	chrD4.37879242	46066549	chrD4	0.119048	0.214866	21	22	0.954545	GG	GG	GG	AG	GG	GG	AG	GG	GG	GG	NA	GG	AA	AG	GG	GG	GG	GG	GG	GG	GG	GG
56	chrD4.37884487	46071794	chrD4	0.181818	0.30444	22	22	1	CC	CC	AC	AC	CC	AC	CC	CC	CC	CC	CC	AC	CC	CC	AC	CC	AC	CC	AC	AC	CC	CC
57	chrD4.37889115	46076422	chrD4	0.357143	0.470383	21	22	0.954545	AA	AA	GG	GG	AA	AA	AG	AA	AG	AA	AG	GG	AG	AA	AG	NA	AG	AA	AG	AG	AA	AG
58	chrD4.37911684	46091037	chrD4	0.404762	0.493612	21	22	0.954545	AA	AA	AG	AG	AG	AA	NA	AG	AG	AG	AA	GG	AG	AG	AA	AG	AG	AG	AG	AG	AG	AG
59	chrD4.37920628	46100018	chrD4	0.166667	0.284553	21	22	0.954545	TT	TT	TT	AA	TT	TT	AA	TT	TT	TT	AA	TT	NA	AT	TT	TT	TT	TT	TT	TT	TT	TT
60	chrD4.37932422	46108834	chrD4	0.261905	0.396051	21	22	0.954545	AA	AA	AA	AA	AG	AG	AA	AA	AG	AG	AA	AG	AG	AG	AG	AA	AG	NA	AA	GG	AA	AA
61	chrD4.37955863	46130610	chrD4	0.15	0.261538	20	22	0.909091	GG	GG	NA	GG	AG	AG	GG	GG	AG	AG	GG	AG	GG	GG	AG	GG	GG	GG	GG	GG	NA	GG
62	chrD4.37959505	46133498	chrD4	0.261905	0.396051	21	22	0.954545	AA	AA	NA	GG	AA	AA	AG	AG	AG	AA	AA	AG	AA	AA	AA	AG	AG	AA	AA	GG	AA	AG
63	chrD4.37972139	46138849	chrD4	0.119048	0.214866	21	22	0.954545	GG	GG	GG	AG	GG	GG	AG	AG	GG	GG	AG	GG	AG	GG	GG	GG	GG	GG	GG	GG	NA	GG
64	chrD4.37976067	46143093	chrD4	0.105263	0.193457	19	22	0.863636	AA	AA	AA	AG	AA	AA	AA	AG	AG	AA	AA	AG	NA	AA	AA	NA	AA	AA	AA	AA	AA	NA
65	chrD4.38007473	46166206	chrD4	0.318182	0.443975	22	22	1	AA	AA	AA	GG	AG	AA	AG	AG	AG	AG	AG	GG	GG	AA	AG	AA	AA	AG	AA	AA	AA	AA
66	chrD4.38014428	46173158	chrD4	0.113636	0.206131	22	22	1	GG	GG	GG	AG	GG	GG	GG	AG	AG	GG	GG	AG	GG	GG	GG	GG	GG	GG	GG	GG	GG	AG
67	chrD4.38020277	46176978	chrD4	0.4	0.492308	20	22	0.909091	GG	GG	AA	AA	AG	GG	AG	AG	AG	GG	AG	AA	AA	AG	GG	AG	GG	AG	GG	GG	NA	NA
68	chrD4.38041217	46188508	chrD4	0.125	0.224359	20	22	0.909091	GG	GG	GG	GG	AG	GG	AG	GG	GG	NA	NA	AG	AG	GG	GG	GG	GG	AG	GG	GG	GG	GG
69	chrD4.38050675	46198174	chrD4	0.238095	0.371661	21	22	0.954545	GG	GG	AA	AG	AG	GG	AG	GG	GG	AG	AG	AG	NA	AG	GG	GG	GG	AG	GG	GG	GG	GG
70	chrD4.38145697	46279271	chrD4	0.2	0.328205	20	22	0.909091	AA	AA	AA	AC	AC	AA	AA	AC	AC	NA	AA	CC	AA	AA	AA	AA	AA	AC	AA	AA	NA	AC
71	chrD4.38152527	46284318	chrD4	0.119048	0.214866	21	22	0.954545	GG	GG	GG	AG	GG	GG	AG	GG	GG	GG	NA	GG	AG	GG	GG	GG	AG	GG	AG	GG	GG	GG
72	chrD4.38159910	46291640	chrD4	0.166667	0.285714	18	22	0.818182	AA	AA	AG	AG	AA	AA	AG	AA	AA	AA	AG	AA	NA	AA	AA	NA	AG	NA	AG	AA	NA	AA
73	chrD4.38177772	46304562	chrD4	0.113636	0.206131	22	22	1	AA	AA	CC	CC	CC	AC	CC	CC	CC	CC	CC	CC	CC	CC	CC	CC	CC	CC	CC	CC	CC	CC
1	chrE2.51517251	42987235	chrE2	0.409091	0.494715	22	22	1	GG	AG	AA	AA	AG	AA	AA	AA	AG	GG	AG	AA	AA	AA	GG	GG	AG	AA	GG	AG	GG	AA
2	chrE2.51520118	42988307	chrE2	0.125	0.224359	20	22	0.909091	AA	AG	NA	AA	AA	AG	AG	AA	AG	AA	AA	AA	AG	AA	AA	AA	AA	AA	AA	AA	AA	NA
3	chrE2.51521316	42989002	chrE2	0.454545	0.5074	22	22	1	AA	GG	AA	AG	AG	GG	GG	AA	AG	AG	AG	AA	GG	AA	AG	AA	AA	GG	AG	AA	AG	GG
4	chrE2.51525774	42993460	chrE2	0.35	0.466667	20	22	0.909091	AA	GG	AG	NA	AG	GG	GG	GG	AG	AG	AG	AG	GG	GG	AG	AA	AG	GG	AG	AG	GG	NA
5	chrE2.51526699	42994387	chrE2	0.261905	0.396051	21	22	0.954545	GG	GG	AG	GG	AG	GG	GG	AA	GG	GG	GG	AG	GG	AA	NA	GG	AG	GG	AG	AG	GG	AG
6	chrE2.51528161	42995849	chrE2	0.473684	0.512091	19	22	0.863636	AA	AG	AG	NA	AG	AG	AG	GG	AA	AG	AG	AG	AG	GG	AG	NA	AG	GG	AG	NA	AA	GG
7	chrE2.51529694	42997382	chrE2	0.181818	0.30444	22	22	1	AA	CC	AA	AA	AA	AC	AA	AA	AA	AA	AC	AA	AA	AA	AA	AA	AA	CC	AA	AA	CC	AA
8	chrE2.51531535	42999223	chrE2	0.272727	0.40592	22	22	1	AA	AC	AC	AA	AC	AC	AA	AC	AA	AC	AC	AA	AA	AA	AC	AA	AA	CC	AC	AA	AA	AC
9	chrE2.51534321	43002009	chrE2	0.157895	0.273115	19	22	0.863636	AA	GG	AA	NA	AA	AG	NA	AA	AA	AA	AG	AA	NA	AA	AA	AA	AA	GG	AA	AA	AA	AA
10	chrE2.51540776	43008463	chrE2	0.4	0.492308	20	22	0.909091	AA	AT	AT	AT	AT	TT	TT	TT	AT	NA	AT	AT	NA	TT	AT	AA	AT	TT	AT	AT	TT	AT
11	chrE2.51554119	43014973	chrE2	0.261905	0.396051	21	22	0.954545	AA	AA	NA	GG	AG	AA	AG	AG	AA	AG	AA	AA	AG	AA	AG	AA	AA	AA	AG	AA	AA	GG
12	chrE2.51559423	43020131	chrE2	0.447368	0.507824	19	22	0.863636	AA	AG	AA	NA	AA	GG	GG	AG	AG	AA	AG	AG	GG	GG	AA	NA	AG	GG	AA	AG	NA	AA
13	chrE2.51564858	43025566	chrE2	0.333333	0.455285	21	22	0.954545	GG	AG	GG	GG	GG	AA	AG	AG	AG	GG	AG	AG	AA	AA	GG	GG	AG	NA	GG	AG	GG	GG
14	chrE2.51566221	43026930	chrE2	0.119048	0.214866	21	22	0.954545	GG	GG	GG	GG	GG	AG	GG	GG	GG	GG	NA	GG	GG	GG	GG	GG	GG	AA	GG	GG	AA	GG
15	chrE2.51567534	43028243	chrE2	0.204545	0.332981	22	22	1	GG	GG	GG	AG	GG	GG	AG	AG	GG	GG	GG	AG	AG	AG	GG	AG	AG	GG	GG	AG	GG	GG
16	chrE2.51570137	43030845	chrE2	0.428571	0.501742	21	22	0.954545	AT	AT	AT	AT	AT	AT	AT	AT	AT	AT	AA	AT	AT	AA	AT	AT	AT	AA	AT	AT	AT	NA
17	chrE2.51571904	43032610	chrE2	0.125	0.224359	20	22	0.909091	AA	AC	AA	AA	AA	AC	AA	AA	AA	AA	AA	AC	NA	AA	AA	AA	AA	CC	AA	AA	NA	AA
18	chrE2.51585773	43038593	chrE2	0.166667	0.284553	21	22	0.954545	AA	AG	AA	AA	AA	AG	AA	AG	AA	AA	AA	AG	AA	NA	AA	AA	AG	AG	AA	AG	AA	AA
19	chrE2.51592381	43045201	chrE2	0.5	0.512821	20	22	0.909091	AA	AG	AG	AA	AG	GG	AG	GG	NA	NA	AG	AG	AG	GG	AG	AA	AG	GG	AG	AG	AG	AA
20	chrE2.51594327	43047147	chrE2	0.47619	0.511034	21	22	0.954545	CC	AC	AC	CC	AC	AC	CC	AA	CC	AC	AC	AC	AC	AA	AC	CC	AC	AA	AC	AC	AA	NA
21	chrE2.51595376	43048196	chrE2	0.142857	0.250871	21	22	0.954545	AA	AA	AA	AA	AG	AA	AA	AA	AA	AG	AA	AA	AA	AA	AG	AA	AA	AG	AG	AA	NA	AG
22	chrE2.51598351	43051172	chrE2	0.159091	0.273784	22	22	1	GG	AG	GG	GG	AG	GG	GG	GG	GG	AG	GG	GG	GG	GG	AG	GG	GG	AG	AG	GG	GG	AG
23	chrE2.51605532	43058353	chrE2	0.409091	0.494715	22	22	1	AA	AG	AG	AA	AA	AG	AA	GG	AA	GG	GG	AG	AA	GG	AA	GG	AG	AA	AA	AG	GG	AA
24	chrE2.51612035	43064857	chrE2	0.447368	0.507824	19	22	0.863636	AA	AG	AG	AA	NA	GG	AG	GG	AG	GG	AA	AG	AG	GG	AG	NA	AG	GG	AG	AG	NA	AG
25	chrE2.51612398	43065220	chrE2	0.277778	0.412698	18	22	0.818182	AA	AA	AG	AA	AA	AG	AA	GG	AA	NA	AG	AG	NA	NA	AA	AG	AG	AG	AA	AG	NA	AA
26	chrE2.51612895	43065717	chrE2	0.261905	0.396051	21	22	0.954545	GG	GG	AG	GG	GG	AG	GG	AA	GG	AG	AG	AG	GG	AG	GG	GG	AG	AG	GG	AG	GG	NA
27	chrE2.51620108	43072931	chrE2	0.447368	0.507824	19	22	0.863636	AA	AG	AG	AA	AG	NA	AA	GG	AA	AG	AG	AG	AA	GG	AG	AG	AG	NA	NA	AG	GG	AG
28	chrE2.51633232	43086050	chrE2	0.113636	0.206131	22	22	1	AA	AG	AA	AA	AA	AG	AG	AA	AG	AA	AA	AA	AG	AA	AA	AA	AA	AA	AA	AA	AA	AA
29	chrE2.51638630	43091448	chrE2	0.166667	0.284553	21	22	0.954545	GG	GG	AG	GG	GG	GG	GG	AA	GG	AG	GG	GG	GG	AG	GG	GG	AG	GG	GG	AG	NA	GG
30	chrE2.51681993	43108574	chrE2	0.447368	0.507824	19	22	0.863636	CC	AC	AC	CC	AC	AA	AC	AA	AC	NA	AC	AC	NA	AA	AC	NA	AC	AA	AC	AC	AC	AC
31	chrE2.51697218	43124042	chrE2	0.368421	0.477952	19	22	0.863636	CC	AC	NA	AC	AA	AC	AC	CC	AC	AC	CC	AC	NA	CC	AC	NA	CC	AC	AC	CC	CC	AA
32	chrE2.51703608	43129740	chrE2	0.35	0.466667	20	22	0.909091	AA	AA	AG	AG	GG	AG	AG	AA	AG	NA	AA	AG	AA	AG	AG	NA	AA	AG	AG	AA	AA	GG
33	chrE2.51711999	43138128	chrE2	0.166667	0.284553	21	22	0.954545	GG	AG	AG	GG	GG	GG	GG	AA	GG	AG	GG	GG	GG	NA	GG	GG	AG	GG	GG	AG	GG	GG
34	chrE2.51717631	43143760	chrE2	0.15	0.261538	20	22	0.909091	GG	GG	AG	GG	GG	GG	GG	AA	GG	NA	GG	GG	GG	AG	GG	NA	AG	GG	GG	AG	GG	GG
35	chrE2.51726633	43146811	chrE2	0.309524	0.437863	21	22	0.954545	AA	AA	NA	AG	GG	GG	AG	GG	AG	GG	AG	GG	AG	GG	AG	GG	AG	GG	AG	AG	GG	GG
36	chrE2.51734815	43153732	chrE2	0.388889	0.488889	18	22	0.818182	GG	GG	NA	NA	CC	CC	NA	CG	CG	CG	CG	CC	NA	CC	CG	GG	CG	CC	CG	CG	CC	CC
37	chrE2.51742679	43160505	chrE2	0.386364	0.485201	22	22	1	GG	AG	AG	AG	AA	AG	AG	GG	AG	AG	GG	AG	AG	AG	AG	GG	GG	AG	AG	GG	GG	AA
38	chrE2.51750493	43168319	chrE2	0.204545	0.332981	22	22	1	AA	AA	AA	AA	AA	AG	AA	AG	AA	AG	AG	AG	AA	AG	AA	AG	AG	AA	AA	AG	AA	AA
39	chrE2.51755903	43170521	chrE2	0.375	0.480769	20	22	0.909091	AA	AG	GG	AG	GG	GG	AG	GG	AG	NA	AG	GG	AG	GG	AG	AA	AG	AG	AG	AG	NA	GG
40	chrE2.51786504	43196513	chrE2	0.295455	0.426004	22	22	1	GG	AG	AG	GG	GG	AG	GG	AA	GG	AG	AG	AG	GG	AA	GG	AG	AG	GG	GG	AG	GG	GG
41	chrE2.51792986	43202997	chrE2	0.261905	0.396051	21	22	0.954545	GG	GG	GG	GG	GG	AG	GG	AG	GG	AG	AG	AG	GG	AA	GG	NA	AG	GG	GG	AG	AA	GG
42	chrE2.51814273	43216692	chrE2	0.342105	0.462304	19	22	0.863636	GG	GG	AA	AG	AA	AA	AG	AA	AG	NA	AG	AA	NA	AG	AG	AA	AG	AA	AG	AG	NA	AA
43	chrE2.51827440	43229906	chrE2	0.4	0.492308	20	22	0.909091	GG	AG	AA	AG	AA	AA	NA	AA	AG	AA	GG	AA	AG	NA	AG	AG	AG	AG	AG	AG	GG	AA
44	chrE2.51833338	43235795	chrE2	0.275	0.408974	20	22	0.909091	TT	AT	AT	AT	AA	TT	TT	TT	AT	AT	TT	AT	AT	TT	AT	TT	TT	NA	AT	TT	TT	NA
45	chrE2.51841688	43244145	chrE2	0.4	0.492308	20	22	0.909091	AA	AA	CC	AC	CC	CC	AC	CC	AC	AC	NA	CC	AA	CC	AC	NA	AC	AC	AC	AC	AC	CC
46	chrE2.51860806	43251678	chrE2	0.375	0.480769	20	22	0.909091	CC	CC	CG	CG	GG	GG	GG	CG	CG	GG	NA	GG	CG	GG	CG	GG	CG	CC	CG	CG	NA	GG
47	chrE2.51866652	43257524	chrE2	0.272727	0.40592	22	22	1	AA	AA	AA	AA	AA	TT	AT	AT	AA	AT	AT	AT	AA	AT	AA	TT	AT	AA	AA	AT	AA	AA
48	chrE2.51886783	43271411	chrE2	0.25	0.384615	20	22	0.909091	AA	AC	CC	CC	CC	CC	CC	CC	AC	CC	AC	CC	CC	CC	AC	AA	NA	AC	CC	AC	CC	NA
49	chrE2.51891657	43276285	chrE2	0.275	0.408974	20	22	0.909091	GG	GG	AG	GG	GG	AG	AG	AA	GG	AG	GG	AG	GG	AG	GG	AG	AG	GG	GG	AG	NA	NA
50	chrE2.51921186	43298909	chrE2	0.181818	0.30444	22	22	1	GG	GG	GG	CG	CC	GG	GG	GG	GG	CG	GG	CG	GG	GG	CG	GG	GG	GG	GG	GG	GG	CC
51	chrE2.51925938	43303663	chrE2	0.386364	0.485201	22	22	1	GG	GG	AA	GG	GG	AG	AG	AG	AA	AG	AA	GG	GG	AA	AG	AA	GG	GG	AG	GG	AG	GG
52	chrE2.51931314	43309039	chrE2	0.166667	0.284553	21	22	0.954545	GG	GG	GG	NA	AA	GG	GG	GG	GG	AG	GG	AG	GG	GG	AG	GG	GG	GG	GG	GG	GG	AA
53	chrE2.51979656	43343243	chrE2	0.45	0.507692	20	22	0.909091	AA	AA	GG	AA	AA	AG	AA	GG	GG	AG	GG	AA	AG	GG	AG	GG	AA	NA	AG	AA	AG	NA
54	chrE2.51994102	43353431	chrE2	0.421053	0.500711	19	22	0.863636	GG	GG	AA	GG	GG	AG	NA	AA	AA	AG	AA	GG	AG	NA	AG	AA	GG	GG	NA	GG	AA	GG
55	chrE2.52004979	43364005	chrE2	0.5	0.512195	21	22	0.954545	AA	AA	AA	GG	GG	AG	AA	AG	GG	GG	AG	AG	AG	GG	AG	GG	AA	AA	AG	AA	NA	GG
56	chrE2.52025036	43383540	chrE2	0.380952	0.483159	21	22	0.954545	AG	AA	GG	AG	GG	AG	AG	GG	GG	GG	GG	AG	AG	AG	GG	GG	AA	AA	AG	AA	NA	GG
57	chrE2.52058629	43409333	chrE2	0.214286	0.344948	21	22	0.954545	GG	GG	GG	GG	GG	AG	GG	AG	AA	AG	NA	GG	GG	AG	GG	AA	GG	GG	AG	GG	GG	GG
58	chrE2.52069619	43414464	chrE2	0.5	0.511628	22	22	1	AG	AA	AA	AG	GG	AG	AG	GG	GG	GG	GG	AG	AA	GG	AG	GG	AA	AA	AG	AA	AA	AG
59	chrE2.52099792	43439701	chrE2	0.340909	0.459831	22	22	1	AG	AA	GG	AG	GG	AG	AG	GG	GG	GG	GG	AG	AG	GG	GG	GG	AA	AA	AG	AA	GG	GG
60	chrE2.52123592	43459561	chrE2	0.15	0.261538	20	22	0.909091	AA	AA	AA	AC	CC	AA	AA	AA	AA	NA	AA	AC	AA	AA	NA	AA	AA	AA	AA	AA	AA	CC
61	chrE2.52131223	43467192	chrE2	0.428571	0.501742	21	22	0.954545	AG	GG	NA	AG	AA	AG	AG	AA	AA	GG	AA	AG	AA	AA	AA	AA	GG	GG	AG	GG	GG	AA
62	chrE2.52140308	43476278	chrE2	0.166667	0.284553	21	22	0.954545	TT	TT	TT	TT	TT	AT	TT	AT	AT	TT	AT	TT	NA	AT	TT	AT	TT	TT	AT	TT	TT	TT
63	chrE2.52157716	43487369	chrE2	0.386364	0.485201	22	22	1	AG	GG	AA	AG	AA	AG	AG	AA	AA	AA	AA	AG	AG	AA	AA	AG	GG	GG	AG	GG	AG	AA
64	chrE2.52169245	43498983	chrE2	0.190476	0.315912	21	22	0.954545	CC	CC	CC	CC	CC	AC	CC	AC	AC	CC	AA	CC	CC	AC	CC	AC	CC	CC	AC	CC	NA	CC
65	chrE2.52183083	43512719	chrE2	0.428571	0.501742	21	22	0.954545	AA	AA	AA	GG	GG	GG	AG	AG	AG	GG	AG	GG	AG	AG	AG	GG	AG	AG	AG	AG	NA	AG
66	chrE2.52199707	43524412	chrE2	0.214286	0.344948	21	22	0.954545	AG	GG	AA	AA	AA	AA	AA	AG	AG	AA	AA	AA	AG	AA	AA	AA	AG	AA	AG	AG	NA	AA
67	chrE2.52215899	43539705	chrE2	0.404762	0.493612	21	22	0.954545	AG	GG	AA	AG	AA	AG	AA	GG	GG	AG	AA	AG	NA	GG	AA	GG	GG	GG	GG	GG	GG	AA
68	chrE2.52234871	43554950	chrE2	0.386364	0.485201	22	22	1	AG	GG	AA	AG	GG	AG	AG	AA	AA	AG	AA	AG	AA	AA	AG	AA	AG	AG	AG	AG	AA	GG
69	chrE2.52253652	43572913	chrE2	0.261905	0.396051	21	22	0.954545	AA	AA	AA	AG	GG	AG	AG	AA	AA	AG	AA	AG	AA	AG	AG	AA	AA	AA	AA	AA	NA	GG
70	chrE2.52258709	43577968	chrE2	0.142857	0.250871	21	22	0.954545	AG	AA	GG	GG	GG	GG	GG	GG	GG	GG	GG	GG	GG	GG	GG	GG	AG	NA	AG	AG	GG	GG
71	chrE2.52268788	43586018	chrE2	0.404762	0.493612	21	22	0.954545	AC	AA	CC	AC	AA	AC	NA	CC	CC	AC	CC	AC	CC	AC	AC	CC	AC	AC	AC	AC	CC	AA
72	chrE2.52273714	43590944	chrE2	0.142857	0.250871	21	22	0.954545	AC	CC	AA	AA	AA	AA	AA	AA	AA	AA	AA	AA	AA	AA	AA	AA	AC	AA	AC	AC	NA	AA
73	chrE2.52289961	43608799	chrE2	0.142857	0.250871	21	22	0.954545	AG	GG	AA	AA	AA	AA	AA	AA	AA	AA	AA	AA	AA	AA	AA	AA	AG	AA	AG	AG	NA	AA
74	chrE2.52329649	43639783	chrE2	0.25	0.383721	22	22	1	CC	CC	CC	CC	CC	CG	CC	CG	CG	CC	GG	CC	CC	GG	CC	CG	CC	CC	CG	CC	GG	CC
75	chrE2.52345001	43655120	chrE2	0.452381	0.507549	21	22	0.954545	AG	GG	AA	AA	AA	AG	AG	GG	GG	AA	GG	AA	AA	GG	AA	AG	AG	AG	GG	AG	NA	AA
76	chrE2.52377888	43675446	chrE2	0.45	0.507692	20	22	0.909091	AA	AA	AA	CC	CC	AC	AC	NA	AA	CC	AA	CC	AA	AA	AC	NA	AC	AC	AA	AC	CC	CC
77	chrE2.52391278	43688835	chrE2	0.125	0.224359	20	22	0.909091	AA	AG	AA	AA	AA	AA	AA	AG	AG	AG	AA	AA	AA	AG	AA	NA	AA	AA	AA	AA	NA	AA
78	chrE2.52406481	43704035	chrE2	0.275	0.408974	20	22	0.909091	AA	AG	AA	AG	GG	AG	AG	NA	AG	NA	AA	AG	AA	AA	AG	AA	AA	AA	AA	AA	AA	GG
79	chrE2.52411082	43708636	chrE2	0.166667	0.284553	21	22	0.954545	CG	CG	GG	GG	GG	GG	CG	GG	GG	GG	GG	GG	GG	GG	GG	GG	CG	CG	CG	CG	NA	GG
80	chrE2.52420920	43713493	chrE2	0.184211	0.308677	19	22	0.863636	AG	AG	GG	GG	GG	GG	AG	GG	GG	GG	GG	GG	NA	GG	GG	NA	AG	AG	AG	AG	NA	GG
81	chrE2.52428768	43719591	chrE2	0.142857	0.250871	21	22	0.954545	AG	AG	AA	AA	AA	AA	AG	AA	AA	AA	AA	AA	AA	AA	AA	NA	AA	AG	AG	AG	AA	AA
82	chrE2.52432950	43723774	chrE2	0.159091	0.273784	22	22	1	AG	AG	GG	GG	GG	GG	AG	GG	GG	GG	GG	GG	GG	GG	GG	GG	AG	AG	AG	AG	GG	GG
83	chrE2.52454900	43745700	chrE2	0.47619	0.511034	21	22	0.954545	AC	AC	CC	AC	CC	CC	AC	AC	AC	AC	CC	AC	NA	AC	AC	AA	AA	AA	AC	AA	AC	CC
84	chrE2.52461706	43751768	chrE2	0.236842	0.371266	19	22	0.863636	GG	AG	GG	NA	GG	GG	GG	AG	NA	AG	GG	AG	AG	GG	NA	AG	AG	AG	GG	AG	GG	GG
85	chrE2.52465932	43755988	chrE2	0.285714	0.418118	21	22	0.954545	AG	AG	AA	AG	GG	GG	GG	GG	GG	AG	GG	AG	AG	AG	GG	AG	AG	AG	GG	GG	NA	GG
86	chrE2.52477814	43767868	chrE2	0.142857	0.250871	21	22	0.954545	GG	GG	GG	GG	AG	AG	AG	GG	GG	AG	GG	GG	GG	GG	AG	GG	GG	GG	AG	GG	GG	NA
87	chrE2.52491986	43775252	chrE2	0.15	0.261538	20	22	0.909091	AA	AA	AA	AA	AG	AG	AG	AA	AA	NA	AA	AA	AA	AA	AG	AA	AA	AA	AG	AA	NA	AG
88	chrE2.52497062	43780328	chrE2	0.404762	0.493612	21	22	0.954545	CC	CC	AA	CC	NA	AC	AA	AA	AA	CC	CC	CC	AC	AA	AA	CC	CC	CC	AC	AC	CC	AC
89	chrE2.52506442	43789576	chrE2	0.25	0.385714	18	22	0.818182	AG	AG	AA	GG	AG	AG	NA	AA	AG	AG	AA	AA	NA	AA	AA	NA	AA	AA	AG	AA	NA	AA
90	chrE2.52511185	43794319	chrE2	0.159091	0.273784	22	22	1	AG	AG	GG	GG	GG	GG	AG	GG	GG	GG	GG	GG	GG	GG	GG	GG	AG	AG	AG	AG	GG	GG
1	chrF2.14046863	10965562	chrF2	0.190476	0.315912	21	22	0.954545	GG	GG	GG	AA	AG	AG	GG	GG	GG	GG	GG	AG	AA	NA	GG	GG	GG	GG	GG	GG	GG	AG
2	chrF2.14091773	10975787	chrF2	0.25	0.383721	22	22	1	GG	AA	AA	GG	GG	AG	GG	AG	GG	AG	AG	GG	GG	AG	AG	GG	AG	GG	GG	GG	GG	GG
3	chrF2.14095860	10979874	chrF2	0.361111	0.474603	18	22	0.818182	AA	GG	NA	AA	AA	AG	AA	AG	AA	AG	NA	AA	GG	AG	GG	AA	AG	NA	AA	AA	NA	GG
4	chrF2.14104066	10988077	chrF2	0.386364	0.485201	22	22	1	AG	AA	AA	AG	AG	AA	GG	AG	AG	AA	AG	GG	AG	AG	AG	AA	AA	AG	AA	AA	GG	AG
5	chrF2.14110065	10994073	chrF2	0.452381	0.507549	21	22	0.954545	AG	AG	AA	AG	GG	AA	GG	AG	AA	AG	GG	GG	AA	AA	AA	AG	AG	NA	AG	AA	GG	AG
6	chrF2.14131758	11010417	chrF2	0.325	0.45	20	22	0.909091	AA	AT	NA	AT	TT	TT	AA	TT	TT	AT	NA	AT	AT	AA	AT	TT	TT	TT	TT	TT	AT	TT
7	chrF2.14137369	11016067	chrF2	0.25	0.383721	22	22	1	GG	GG	AG	GG	GG	AA	GG	GG	AG	GG	GG	GG	GG	GG	AG	AG	AG	AG	AG	AA	GG	GG
8	chrF2.14197512	11032529	chrF2	0.394737	0.490754	19	22	0.863636	AC	AC	AA	CC	CC	AA	AA	AC	AA	NA	AA	AC	AC	AC	NA	AC	AC	AC	AC	AA	NA	AC
9	chrF2.14229169	11051526	chrF2	0.325	0.45	20	22	0.909091	AG	AG	GG	AA	AA	GG	GG	AG	GG	NA	GG	AG	GG	AG	AG	AG	AG	GG	NA	GG	GG	AG
10	chrF2.14287197	11066672	chrF2	0.363636	0.473573	22	22	1	AA	AG	GG	AA	AA	AG	AA	AA	AG	AG	AA	AA	AG	AG	AA	AG	AG	AG	AG	GG	GG	AA
11	chrF2.14344775	11086497	chrF2	0.333333	0.455285	21	22	0.954545	AG	AG	GG	GG	GG	GG	AA	AG	AG	NA	AA	AG	AG	GG	AG	GG	GG	GG	GG	GG	AA	AG
12	chrF2.14355593	11097347	chrF2	0.431818	0.502114	22	22	1	AA	AA	AA	GG	AA	GG	GG	AA	AG	AA	AG	AG	GG	AG	AA	AG	AA	AG	AG	GG	GG	AA
13	chrF2.14419434	11119106	chrF2	0.25	0.384615	20	22	0.909091	AA	AA	AA	GG	GG	GG	GG	GG	AG	GG	NA	GG	NA	GG	AG	GG	AG	GG	GG	GG	GG	AG
14	chrF2.14450169	11131951	chrF2	0.25	0.384615	20	22	0.909091	AA	AA	AA	GG	GG	GG	GG	GG	AG	GG	NA	GG	NA	GG	AG	GG	AG	GG	GG	GG	GG	AG
15	chrF2.14508396	11171410	chrF2	0.119048	0.214866	21	22	0.954545	AA	AG	AA	AA	AA	AA	AA	AA	AG	AA	AA	AA	AG	AA	AG	AA	AG	AA	AA	AA	NA	AA
16	chrF2.14533841	11179729	chrF2	0.136364	0.241015	22	22	1	CC	AC	CC	CC	CC	CC	CC	CC	AC	CC	CC	CC	AC	CC	AC	CC	AC	CC	CC	CC	CC	AC
17	chrF2.14578209	11191600	chrF2	0.113636	0.206131	22	22	1	GG	AG	GG	GG	GG	GG	GG	GG	AG	GG	GG	GG	AG	GG	AG	GG	AG	GG	GG	GG	GG	GG
18	chrF2.14587072	11200475	chrF2	0.119048	0.214866	21	22	0.954545	GG	GG	AA	GG	GG	GG	GG	AG	AG	GG	NA	GG	GG	GG	GG	GG	GG	GG	GG	GG	GG	AG
19	chrF2.13591589	11851572	chrF2	0.35	0.466667	20	22	0.909091	AA	AA	AA	AA	AG	GG	AG	AG	AA	AG	AG	AG	AG	AA	AA	NA	AG	NA	GG	AG	AG	AA
20	chrF2.13600920	11860869	chrF2	0.263158	0.398293	19	22	0.863636	TT	TT	NA	AT	AT	AT	NA	TT	TT	AT	AT	AT	TT	TT	AT	NA	TT	TT	TT	AT	TT	AA
21	chrF2.13604738	11863772	chrF2	0.428571	0.501742	21	22	0.954545	GG	GG	AG	AA	AG	AA	NA	GG	AG	AG	AG	AG	AG	AA	AG	AG	GG	GG	GG	AG	GG	AA
22	chrF2.13611711	11870741	chrF2	0.238095	0.371661	21	22	0.954545	AA	AA	AA	GG	AA	AA	AA	AA	AG	GG	AA	AA	GG	GG	AA	AA	AA	AG	AA	AA	AA	NA
23	chrF2.13620924	11879431	chrF2	0.5	0.512821	20	22	0.909091	AA	AG	NA	AA	AG	AG	AG	AG	AG	AA	AG	AG	AG	AA	AA	GG	AG	GG	GG	GG	GG	NA
24	chrF2.13629057	11887559	chrF2	0.428571	0.501742	21	22	0.954545	AA	AA	AG	GG	GG	AG	AG	AA	AG	GG	AG	AG	NA	GG	AG	GG	AG	GG	AA	AA	GG	GG
25	chrF2.13632907	11889787	chrF2	0.142857	0.250871	21	22	0.954545	AA	AG	AG	GG	GG	GG	GG	AG	GG	GG	GG	GG	GG	GG	AG	GG	GG	NA	GG	GG	GG	GG
26	chrF2.13634964	11891843	chrF2	0.454545	0.5074	22	22	1	GG	GG	AG	AA	AA	AG	AG	GG	AG	AA	AG	AG	AG	AA	AG	AA	AG	AA	GG	GG	AG	AA
27	chrF2.13637990	11894845	chrF2	0.425	0.501282	20	22	0.909091	GG	AG	NA	GG	GG	AG	AA	AG	AG	GG	AA	AG	AG	GG	GG	GG	AG	NA	AA	AA	AA	GG
28	chrF2.13642036	11898887	chrF2	0.472222	0.512698	18	22	0.818182	AA	AA	AG	NA	GG	AG	AA	AA	NA	GG	AA	AG	AG	GG	AG	AG	GG	NA	AG	AA	NA	GG
29	chrF2.13650034	11902366	chrF2	0.47619	0.511034	21	22	0.954545	AA	AG	AG	AA	AA	AG	GG	AA	GG	AA	GG	AG	NA	GG	AA	GG	AG	AA	AG	GG	AG	AG
30	chrF2.13654489	11906763	chrF2	0.285714	0.418118	21	22	0.954545	GG	AG	AA	AA	AA	AA	AA	AG	AG	AG	AA	AA	AG	GG	AG	AA	AG	AG	AA	AA	AA	NA
31	chrF2.13659063	11911331	chrF2	0.47619	0.511034	21	22	0.954545	GG	GG	AG	AA	AA	AG	AG	AG	AG	AA	AG	AA	AG	AA	AG	AG	AG	NA	AG	GG	GG	AG
32	chrF2.13661427	11913689	chrF2	0.475	0.511538	20	22	0.909091	AA	AA	AG	GG	GG	AG	AG	AG	AA	NA	AG	GG	AG	GG	AG	NA	AG	AG	AG	AA	GG	AG
33	chrF2.13678023	11930392	chrF2	0.131579	0.234708	19	22	0.863636	AA	AA	AA	AA	AA	AA	AA	AA	AA	NA	NA	AA	AC	AA	AA	NA	AC	CC	AA	AA	AC	AA
34	chrF2.13681094	11933463	chrF2	0.404762	0.493612	21	22	0.954545	GG	GG	NA	CC	CC	CG	CG	CG	CG	CG	CG	CC	CG	CC	CG	CC	CG	CG	GG	CG	CC	CC
35	chrF2.13684154	11936518	chrF2	0.361111	0.474603	18	22	0.818182	AC	AC	AC	AA	AA	AC	AC	AC	CC	NA	AC	AA	NA	AA	CC	NA	AA	AA	AC	AC	NA	AA
36	chrF2.13691471	11943826	chrF2	0.425	0.501282	20	22	0.909091	AT	TT	NA	AA	AA	AT	AT	AT	AT	AT	TT	AA	TT	AA	AT	AA	AT	AA	TT	AT	NA	AA
37	chrF2.13692429	11944784	chrF2	0.428571	0.501742	21	22	0.954545	AC	CC	NA	AA	AA	AC	AC	AC	AC	AC	AC	AA	AC	AA	AC	AA	AC	AC	CC	AC	CC	AA
38	chrF2.13719240	11953833	chrF2	0.477273	0.510571	22	22	1	GG	GG	AG	AA	AA	AG	AG	AG	GG	AG	AG	AA	AG	AA	GG	AA	AG	GG	GG	AG	AA	AA
39	chrF2.13775390	11990244	chrF2	0.4	0.492308	20	22	0.909091	AA	AA	AG	AA	AG	AA	GG	AA	AA	NA	AA	AG	AA	AG	GG	GG	AG	GG	GG	AG	NA	AA
40	chrF2.13805836	12002036	chrF2	0.342105	0.462304	19	22	0.863636	AA	AA	AG	AG	AA	GG	AG	AA	GG	AA	AA	AA	NA	AG	AA	NA	AA	AA	AG	GG	GG	NA
41	chrF2.13826635	12022859	chrF2	0.380952	0.483159	21	22	0.954545	GG	AG	AA	AA	AG	AG	AA	AA	AA	AG	AA	AA	AG	AG	AG	NA	AG	GG	GG	AG	AG	AA
42	chrF2.13845751	12041957	chrF2	0.136364	0.241015	22	22	1	AG	GG	AA	AA	AA	AA	AA	AA	AA	AA	GG	AA	AA	AA	AG	AA	AA	AA	AA	AA	AA	AA
43	chrF2.13851309	12047507	chrF2	0.45	0.507692	20	22	0.909091	AG	AG	AA	AA	AG	AG	AG	AG	AG	AG	AG	AA	AA	GG	AG	GG	AG	GG	NA	AG	NA	AA
44	chrF2.13878246	12055830	chrF2	0.431818	0.502114	22	22	1	AG	AG	AA	AA	AG	AG	AG	AG	AG	AG	AG	AA	AA	GG	AA	GG	AG	GG	AA	AG	GG	AA
45	chrF2.13884973	12062339	chrF2	0.263158	0.398293	19	22	0.863636	AA	AA	AA	AT	AT	AA	AA	AA	AT	NA	AA	AT	AA	AA	NA	NA	AT	AA	TT	AT	AA	TT
46	chrF2.13900752	12077174	chrF2	0.272727	0.40592	22	22	1	GG	CG	GG	CG	CG	GG	CG	GG	CG	GG	GG	CC	GG	GG	GG	GG	GG	CG	CG	CG	GG	CC
47	chrF2.13913563	12086551	chrF2	0.227273	0.359408	22	22	1	AG	GG	GG	GG	AG	AG	GG	GG	AG	GG	GG	GG	GG	AA	GG	AA	GG	AG	GG	AG	GG	GG
48	chrF2.13918719	12091710	chrF2	0.342105	0.462304	19	22	0.863636	AG	GG	AA	NA	AG	GG	AG	AG	AG	AG	GG	AA	GG	GG	AG	GG	NA	GG	AG	AG	GG	NA
49	chrF2.13927653	12100628	chrF2	0.357143	0.470383	21	22	0.954545	AA	AA	AA	AG	AG	GG	AA	AG	AG	AG	AA	AA	AG	GG	AA	GG	AA	GG	AA	AG	NA	AA
50	chrF2.13937569	12110539	chrF2	0.275	0.408974	20	22	0.909091	AA	AG	AA	AG	AG	AA	AA	AA	AA	NA	AA	AG	AA	AA	GG	AA	AG	AA	AG	AG	NA	GG
51	chrF2.13964939	12120621	chrF2	0.136364	0.241015	22	22	1	AG	AA	GG	AA	AA	AA	AA	AA	AA	AG	AG	AA	AA	AA	AA	AA	AG	AA	AA	AA	AA	AA
52	chrF2.13973264	12126560	chrF2	0.113636	0.206131	22	22	1	GG	AG	GG	GG	GG	GG	GG	GG	GG	GG	GG	GG	AG	GG	AG	GG	AG	GG	AG	GG	GG	GG
53	chrF2.13979463	12134308	chrF2	0.35	0.466667	20	22	0.909091	AA	AA	AC	CC	CC	AC	CC	CC	CC	AC	AC	CC	NA	CC	AC	CC	AA	AC	NA	CC	AA	CC
54	chrF2.13985621	12137564	chrF2	0.333333	0.457143	18	22	0.818182	AA	AA	NA	GG	GG	AG	GG	GG	GG	NA	AA	GG	AG	GG	AG	NA	AA	NA	AG	GG	GG	GG
55	chrF2.14000554	12156880	chrF2	0.388889	0.488889	18	22	0.818182	AT	TT	NA	AA	AA	AT	NA	AA	AT	AA	AT	AA	TT	AA	AT	NA	TT	NA	AT	AA	TT	AA
56	chrF2.14004671	12160998	chrF2	0.428571	0.501742	21	22	0.954545	AG	GG	AG	GG	AG	AG	NA	AG	AG	AG	GG	AG	GG	AA	AG	AA	GG	AG	AG	AA	GG	AG
57	chrF2.14021736	12178094	chrF2	0.425	0.501282	20	22	0.909091	AG	AA	AG	AG	AG	AG	AG	AG	GG	AG	AA	AG	AG	GG	AG	GG	AG	NA	AG	GG	GG	NA
58	chrF2.14072951	12199787	chrF2	0.210526	0.341394	19	22	0.863636	GG	GG	GG	AG	GG	GG	GG	GG	NA	GG	GG	GG	GG	GG	AG	NA	AA	NA	AA	AG	AG	GG
59	chrF2.14152932	12221277	chrF2	0.45	0.507692	20	22	0.909091	AA	AA	AG	AA	AG	AG	AG	AG	GG	GG	AG	AG	AG	GG	AA	NA	AA	GG	AA	AG	NA	AG
60	chrF2.14157340	12225681	chrF2	0.15	0.261538	20	22	0.909091	AG	AA	GG	GG	GG	GG	GG	GG	GG	NA	GG	GG	GG	GG	AG	GG	AG	GG	AG	GG	NA	GG
61	chrF2.14164352	12232690	chrF2	0.214286	0.344948	21	22	0.954545	AA	GG	AA	AG	GG	GG	GG	AG	GG	AG	GG	GG	AG	GG	GG	GG	GG	NA	GG	GG	GG	AG
62	chrF2.14174796	12243132	chrF2	0.444444	0.507937	18	22	0.818182	AA	AA	AC	NA	AC	AC	AC	AC	AC	NA	AC	AC	AA	AC	AC	NA	AC	AA	CC	CC	NA	AC
63	chrF2.14183076	12251403	chrF2	0.2	0.328205	20	22	0.909091	AA	AA	AA	AG	AG	AG	NA	AG	AG	AA	NA	AG	AA	AG	AA	AA	AA	AA	AA	AA	AA	AG
64	chrF2.14211679	12259028	chrF2	0.472222	0.512698	18	22	0.818182	AG	AG	AG	NA	AG	AG	AG	AG	AG	AG	GG	AG	AG	NA	AG	AG	AG	NA	AG	AG	NA	AG
65	chrF2.14242625	12273530	chrF2	0.363636	0.473573	22	22	1	AG	GG	AG	AG	AG	AG	AG	AG	AG	GG	AG	AG	AG	GG	AG	GG	AG	GG	GG	GG	AG	AA
66	chrF2.14258655	12288145	chrF2	0.295455	0.426004	22	22	1	CG	CC	GG	CG	GG	GG	GG	GG	GG	CG	GG	GG	CC	GG	CG	GG	CG	CG	CG	GG	CC	GG
67	chrF2.14274067	12303547	chrF2	0.159091	0.273784	22	22	1	AA	AA	AA	AG	AG	AG	AA	AG	AG	AA	AA	AG	AA	AA	AA	AA	AA	AA	AA	AA	AA	AG
68	chrF2.14324059	12326965	chrF2	0.15	0.261538	20	22	0.909091	AA	GG	AA	AA	AA	AA	AA	AA	AA	AA	AA	AA	GG	AA	AA	NA	AG	AA	AG	AA	NA	AA
69	chrF2.14384174	12339043	chrF2	0.214286	0.344948	21	22	0.954545	GG	AA	AG	GG	GG	GG	GG	GG	GG	GG	AG	GG	AA	GG	AG	NA	GG	GG	GG	GG	GG	AA
70	chrF2.14402537	12351124	chrF2	0.238095	0.371661	21	22	0.954545	AA	TT	AT	AA	AA	AA	AT	AA	AA	AA	AA	AT	AT	AA	TT	NA	AA	AA	AA	AA	AA	TT
71	chrF2.14498072	12400200	chrF2	0.3	0.430769	20	22	0.909091	AG	AG	AG	AA	AA	AA	AG	AA	AA	AA	AA	AG	NA	AA	GG	GG	AG	AG	AA	AA	NA	AG
72	chrF2.14516667	12410911	chrF2	0.142857	0.250871	21	22	0.954545	AG	AA	AA	AA	AA	AA	AA	AA	AA	AA	AA	AA	AG	AA	AG	NA	AA	AG	AA	AA	GG	AA
73	chrF2.14542300	12424649	chrF2	0.272727	0.40592	22	22	1	GG	CG	CG	GG	GG	GG	CG	GG	GG	GG	GG	CG	CG	GG	CG	CC	CG	GG	GG	GG	CG	CC
74	chrF2.14549793	12432168	chrF2	0.272727	0.40592	22	22	1	AC	CC	AA	AC	AA	AA	AA	AC	AA	AA	AC	AA	AC	AC	AA	AA	AC	AA	AC	AC	AC	AA
75	chrF2.14554145	12436516	chrF2	0.238095	0.371661	21	22	0.954545	AG	AG	GG	AG	GG	GG	GG	GG	GG	GG	AG	GG	GG	GG	AG	GG	AG	AG	AG	NA	AA	GG
76	chrF2.14558701	12441073	chrF2	0.214286	0.344948	21	22	0.954545	GG	GG	GG	GG	AG	GG	NA	AA	AG	AG	GG	GG	GG	AG	GG	GG	GG	AG	AG	AG	GG	GG
77	chrF2.14562809	12445150	chrF2	0.388889	0.488889	18	22	0.818182	AC	AA	CC	AC	AC	CC	NA	AA	AC	AC	NA	CC	NA	AC	NA	AA	AA	AA	AA	AA	AA	CC
78	chrF2.14569007	12451350	chrF2	0.309524	0.437863	21	22	0.954545	AG	GG	NA	AG	AA	AA	AA	AA	AA	AA	AG	AA	AG	AA	AG	AA	AG	AG	AG	AG	GG	AA
1	chrX.121436747	100018322	chrX	0.113636	0.206131	22	22	1	AA	AA	AA	AA	AA	AA	AA	AA	AA	AA	AA	GG	AA	AA	AA	AA	AA	AA	AA	AA	GG	AG
2	chrX.121442941	100024515	chrX	0.131579	0.234708	19	22	0.863636	TT	TT	TT	NA	TT	TT	TT	TT	TT	TT	TT	AA	TT	NA	TT	TT	TT	NA	TT	TT	AA	AT
3	chrX.121450857	100032431	chrX	0.175	0.296154	20	22	0.909091	AG	GG	AA	AG	AA	AA	AA	AA	AA	NA	AA	GG	AA	AA	AA	AA	AA	AA	AA	AA	NA	AG
4	chrX.121452384	100033958	chrX	0.136364	0.241015	22	22	1	AG	AA	GG	GG	GG	GG	GG	GG	GG	GG	GG	AA	GG	GG	GG	GG	GG	GG	GG	GG	GG	AG
5	chrX.121454849	100036423	chrX	0.15	0.261538	20	22	0.909091	CG	GG	CC	CC	CC	CC	CC	CC	CC	CC	CC	GG	CC	CC	CC	NA	CC	CC	CC	CC	NA	CG
6	chrX.121456423	100037997	chrX	0.136364	0.241015	22	22	1	AG	AA	GG	GG	GG	GG	GG	GG	GG	GG	GG	AA	GG	GG	GG	GG	GG	GG	GG	GG	GG	AG
7	chrX.121476367	100040092	chrX	0.166667	0.285714	18	22	0.818182	CG	CC	GG	GG	GG	GG	GG	GG	GG	GG	GG	CC	NA	GG	GG	CG	GG	NA	GG	GG	NA	NA
8	chrX.121480517	100044242	chrX	0.2	0.328205	20	22	0.909091	AG	AA	GG	GG	GG	GG	GG	GG	GG	GG	GG	AA	NA	GG	GG	GG	GG	NA	GG	GG	AA	AG
9	chrX.121482397	100046122	chrX	0.166667	0.284553	21	22	0.954545	AG	GG	AA	AA	AA	AA	AA	AA	AA	AA	AA	GG	AG	AA	AA	AA	AA	AA	AA	AA	NA	AG
10	chrX.121483204	100046930	chrX	0.166667	0.285714	18	22	0.818182	AG	GG	AA	AA	AA	AA	AA	AA	AA	NA	AA	GG	NA	AA	AA	NA	AA	AA	AA	AA	AG	NA
11	chrX.121494541	100054947	chrX	0.190476	0.315912	21	22	0.954545	AG	GG	AA	AA	AA	AA	AA	AA	AA	NA	AA	GG	AA	AA	AA	AA	AA	AA	AA	AA	GG	AG
12	chrX.121495354	100055760	chrX	0.136364	0.241015	22	22	1	AC	CC	AA	AA	AA	AA	AA	AA	AA	AA	AA	CC	AA	AA	AA	AA	AA	AA	AA	AA	AA	AC
13	chrX.121515160	100073145	chrX	0.142857	0.250871	21	22	0.954545	AC	AA	CC	CC	CC	CC	CC	CC	CC	CC	CC	AA	CC	CC	CC	CC	CC	CC	CC	CC	NA	AC
14	chrX.121518513	100076497	chrX	0.194444	0.322222	18	22	0.818182	GG	GG	NA	GG	GG	GG	GG	GG	GG	GG	GG	AA	AG	NA	GG	GG	NA	NA	GG	GG	AA	AA
15	chrX.121526734	100079954	chrX	0.119048	0.214866	21	22	0.954545	GG	GG	GG	GG	GG	GG	GG	GG	GG	GG	GG	AA	AG	GG	GG	GG	GG	GG	GG	GG	AA	NA
16	chrX.121531345	100082101	chrX	0.184211	0.308677	19	22	0.863636	AG	GG	AA	AA	AA	AA	AA	AA	AA	AA	AA	GG	NA	AA	AA	AA	AA	NA	AA	AA	NA	GG
17	chrX.121533376	100084323	chrX	0.119048	0.214866	21	22	0.954545	AA	AA	AA	AA	AA	AA	AA	AA	AA	AA	AA	GG	AA	AA	AA	AA	AA	NA	AA	AA	GG	AG
18	chrX.121535239	100086185	chrX	0.119048	0.214866	21	22	0.954545	AC	CC	AA	AA	AA	AA	AA	AA	AA	AA	AA	AA	NA	AA	AA	AA	AA	AA	AA	AA	CC	AA
19	chrX.121542533	100093374	chrX	0.113636	0.206131	22	22	1	AG	AA	GG	GG	GG	GG	GG	GG	GG	GG	GG	AG	AG	GG	GG	GG	GG	GG	GG	GG	GG	GG
20	chrX.121545662	100096497	chrX	0.113636	0.206131	22	22	1	CG	CC	GG	GG	GG	GG	GG	GG	GG	GG	GG	CG	GG	GG	GG	GG	GG	GG	GG	GG	CG	GG
21	chrX.121549183	100100018	chrX	0.113636	0.206131	22	22	1	AT	TT	AA	AA	AA	AA	AA	AA	AA	AA	AA	AT	AT	AA	AA	AA	AA	AA	AA	AA	AA	AA
22	chrX.121553699	100104534	chrX	0.142857	0.250871	21	22	0.954545	AG	AA	GG	GG	GG	GG	GG	GG	GG	GG	GG	AG	AG	GG	GG	GG	GG	GG	GG	GG	AG	NA
23	chrX.121556811	100107646	chrX	0.113636	0.206131	22	22	1	AG	GG	AA	AA	AA	AA	AA	AA	AA	AA	AA	AG	AA	AA	AA	AA	AA	AA	AA	AA	AG	AA
24	chrX.121558025	100108860	chrX	0.159091	0.273784	22	22	1	AT	AA	TT	AT	TT	TT	TT	TT	TT	TT	TT	AT	AT	TT	TT	TT	TT	TT	TT	TT	AT	TT
25	chrX.121569809	100112070	chrX	0.113636	0.206131	22	22	1	AG	GG	AA	AA	AA	AA	AA	AA	AA	AA	AA	AG	AA	AA	AA	AA	AA	AA	AA	AA	AG	AA
26	chrX.121572250	100113237	chrX	0.105263	0.193457	19	22	0.863636	AG	GG	AA	AA	AA	AA	AA	AA	AA	NA	AA	AG	AA	AA	AA	AA	AA	NA	AA	AA	NA	AA
27	chrX.121574487	100115474	chrX	0.142857	0.250871	21	22	0.954545	AG	AA	GG	GG	GG	GG	GG	GG	GG	GG	GG	AG	GG	GG	GG	GG	GG	NA	GG	GG	AA	GG
28	chrX.121582543	100123572	chrX	0.113636	0.206131	22	22	1	AG	AA	GG	GG	GG	GG	GG	GG	GG	GG	GG	AG	GG	GG	GG	GG	GG	GG	GG	GG	AG	GG
29	chrX.121979731	100444397	chrX	0.138889	0.246032	18	22	0.818182	AG	GG	AA	NA	GG	GG	GG	GG	GG	NA	GG	GG	NA	GG	GG	GG	GG	NA	GG	GG	AA	GG
30	chrX.122043635	100500021	chrX	0.159091	0.273784	22	22	1	AG	GG	AA	GG	GG	GG	GG	GG	GG	GG	GG	GG	GG	GG	GG	GG	GG	AA	GG	GG	AA	GG
31	chrX.122097591	100544380	chrX	0.136364	0.241015	22	22	1	AC	CC	AA	CC	CC	CC	CC	CC	CC	CC	CC	CC	CC	CC	CC	CC	CC	AA	CC	CC	AC	CC
32	chrX.122122507	100561621	chrX	0.113636	0.206131	22	22	1	AC	CC	AA	CC	CC	CC	CC	CC	CC	CC	CC	CC	CC	CC	CC	CC	CC	AA	CC	CC	CC	CC
33	chrX.122220649	100639106	chrX	0.136364	0.241015	22	22	1	AG	AA	GG	AA	AA	AA	AA	AA	AA	AA	AA	AA	AA	AA	AA	AA	AA	GG	AA	AA	AG	AA
34	chrX.122274868	100681544	chrX	0.119048	0.214866	21	22	0.954545	AC	AA	CC	AA	AA	AA	AA	AA	AA	AA	AA	AA	AA	AA	AA	AA	AA	CC	AA	AA	NA	AA
35	chrX.122278410	100684264	chrX	0.159091	0.273784	22	22	1	AG	AA	GG	AA	AA	AA	AA	AA	AA	AA	AA	AA	AA	AA	AA	AA	AA	GG	AA	AA	GG	AA
36	chrX.122343524	100735851	chrX	0.119048	0.214866	21	22	0.954545	AA	AA	GG	AA	AA	AA	AA	AA	AA	AA	AA	AG	AA	AA	AA	AA	AA	GG	AA	AA	NA	AA
37	chrX.122348587	100740914	chrX	0.166667	0.284553	21	22	0.954545	AG	AA	GG	AA	AA	AA	AA	AA	AA	AA	NA	AG	AA	AA	AA	AA	AA	GG	AA	AA	AG	AA
